# Supplementary material for: Total synthesis of a piperidine alkaloid, microcosamine A
Source: Royal Society of Chemistry journal article supplement (doi:10.1039/c5ob02085a), 2015-11-03

## Total synthesis of a piperidine alkaloid, Microcosamine A

Chada Raji Reddy,<sup>\*[a]</sup> Bellamkonda Latha,<sup>[a]</sup> Kamalkishor Warudikar<sup>[a]</sup> and Kiran Kumar Singarapu<sup>[b]</sup>

<sup>a</sup>Division of Natural Products Chemistry, <sup>b</sup>Centre for NMR & Structural Chemistry

CSIR-Indian Institute of Chemical Technology, Hyderabad-500007, India

E-mail: [rajireddy@iict.res.in](mailto:rajireddy@iict.res.in)

### Contents

|                                                                                                  |   |               |
|--------------------------------------------------------------------------------------------------|---|---------------|
| Experimental procedures for preparation of <b>5</b> from 1-octyne ( <b>8</b> ), <b>Scheme S1</b> | : | <b>S2-S3</b>  |
| Comparison of NMR data for natural and synthetic Microcosamine ( <b>2a</b> ), <b>Table S1</b>    | : | <b>S4</b>     |
| <sup>1</sup> H and <sup>13</sup> C NMR spectra of new compounds                                  | : | <b>S5-S36</b> |

**Scheme S1:** Preparation of conjugated alcohol **5** from 1-octyne (**8**)

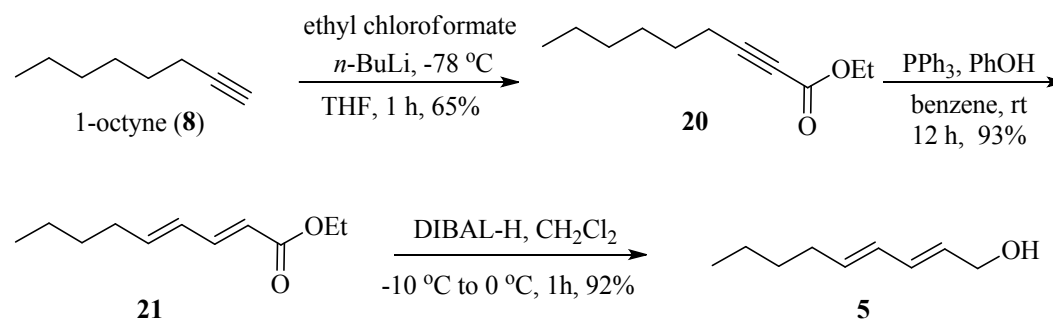

**Ethyl non-1-ynoate (20):**

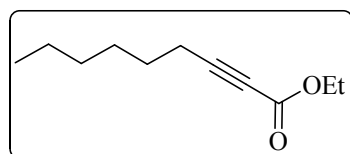

To a solution of alkyne **8** (5.5 g, 50 mmol) in dry THF (100 mL) at -78 °C was added dropwise *n*-BuLi (24 mL, 2.5 M in hexanes, 60 mmol). The solution was stirred for 1 hour at same temperature before adding ethyl chloroformate (5.5 mL, 60 mmol) in THF (15 mL) at -78 °C. The reaction mixture was stirred at that temperature for 1 h and then warmed to 0 °C. After stirring for 1 h at 0 °C, the reaction was quenched with a saturated aqueous NH<sub>4</sub>Cl solution (50 mL). The aqueous layer was separated and extracted with Et<sub>2</sub>O ( 2 X 100 mL). The combined organic layers were washed with brine (50 mL) and dried over Na<sub>2</sub>SO<sub>4</sub>, filtered, and concentrated under reduced pressure. Flash chromatography of the crude product over silica gel (hexanes/EtOAc 98:2) gave **20** (5.5 g, 65%) as a colorless oil. <sup>1</sup>H NMR (300 MHz, CDCl<sub>3</sub>) : δ 4.22 (q, 2H, *J* = 7.0 Hz), 2.30-2.41 (m, 2H), 1.53-1.61 (m, 2H), 1.37-1.43 (m, 2H), 1.28-1.33 (m, 7H), 0.89 (t, 3H, *J* = 7.0 Hz); <sup>13</sup>C NMR (75 MHz, CDCl<sub>3</sub>) : δ 153.8, 89.4, 73.1, 61.7, 31.2, 28.5, 27.5, 22.4, 18.6; MS (EI): *m/z* 182 (M+H)<sup>+</sup>.

**Ethyl (2*E*,4*E*)-nona-2,4-dienoate (21).**

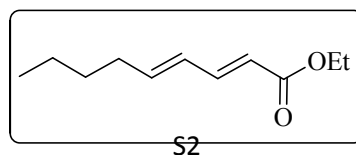

To a stirred solution of alkyne ester **20** (4.0 g, 21.9 mmol) in benzene (45 mL) at room temperature was added PPh<sub>3</sub> (5.75 g, 21.9 mmol) and phenol (2.05 g, 21.9 mmol). The resulting reaction mixture was stirred at room temperature for 12 h. The solution was then diluted with diethyl ether (50 mL) and 1 N NaOH (30 mL), and the organic layer was separated. The aqueous layer was extracted with ether (2 x 50 mL) and the combined organic layers were washed water (50 mL), brine (50 mL), dried over Na<sub>2</sub>SO<sub>4</sub> and evaporated under reduced pressure. The residue was dissolved in ether (100 mL) and MeI (2.0 mL) was added to the solution. The reaction mixture was stirred at room temperature for 3 h. Then, the solution was filtered, concentrated and purified by flash chromatography (silica gel, hexanes/EtOAc 97:3) to give diene **21** (3.7 g, 93%) as a light yellow oil. <sup>1</sup>H NMR (300 MHz, CDCl<sub>3</sub>) : δ 7.26 (dd, 1H, *J* = 15.2, 9.3 Hz), 6.06-6.22 (m, 2H), 5.78 (d, 1H, *J* = 15.4 Hz), 4.19 (q, 2H, *J* = 7.1 Hz), 2.14-2.18 (m, 2H), 1.26-1.43 (m, 7H), 0.90 (t, 3H, *J* = 7.1 Hz); <sup>13</sup>C NMR (75 MHz, CDCl<sub>3</sub>): δ 167.2, 145.0, 144.6, 128.3, 119.1, 60.1, 32.6, 30.8, 22.2, 14.2, 13.8.

**(2*E*,4*E*)-Nona-2,4-dien-1-ol (5):**

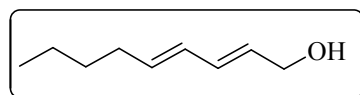

Compound **21** (3.0 g, 1.64 mmol) was taken in dry CH<sub>2</sub>Cl<sub>2</sub> (15 mL), cooled to -78 °C and DIBAL-H (1.0 M in toluene, 4.1 mL, 4.12 mmol) was added **dropwise** and stirred at that temperature for 15 min. The reaction mixture was slowly warmed to 0 °C, stirred for 1 h. The reaction was then quenched by slow addition of saturated potassium-sodium tartrate solution (10 mL) and brought to room temperature. The reaction mixture was stirred until **two layers got separated**. Organic layer was taken out, and aqueous layer was further extracted with CH<sub>2</sub>Cl<sub>2</sub> (2 x 10 mL), combined organic layers were washed with brine and dried over Na<sub>2</sub>SO<sub>4</sub>. **Solvents were** evaporated under reduced pressure. Flash chromatography of the residue over silica gel (hexanes/EtOAc 8:2) gave **5** (2.1 g, 92%) as a colorless oil. <sup>1</sup>H NMR (300 MHz, CDCl<sub>3</sub>) : δ 6.17 (dd, *J* = 14.8, 10.4 Hz, 1H), 6.00 (dd, *J* = 14.8, 10.4 Hz, 1H), 5.67 (dt, *J* = 14.8, 6.7 Hz, 2H), 4.13 (d, *J* = 6.7 Hz, 2H), 2.05 (q, *J* = 6.7 Hz, 2H), 1.33 (m, 4H), 0.86 (t, *J* = 7.0 Hz, 3H); <sup>13</sup>C NMR (75 MHz, CDCl<sub>3</sub>): δ 135.7, 132.2, 129.0, 128.6, 63.3, 32.0, 32.0, 21.9, 13.6.

**Table S1:** Comparison of  $^1\text{H}$  and  $^{13}\text{C}$  NMR ( $\text{CDCl}_3$ ) data for natural and synthetic Microcosamine (**2a**)

| no.              | Natural             |                                   | Synthetic           |                                  |
|------------------|---------------------|-----------------------------------|---------------------|----------------------------------|
|                  | $\delta_{\text{C}}$ | $\delta_{\text{H}}$ ( $J$ in Hz)  | $\delta_{\text{C}}$ | $\delta_{\text{H}}$ ( $J$ in Hz) |
| 2                | 58.4                | 2.50 (dq, $J = 10.0, 6.4$ Hz)     | 58.3                | 2.50-2.57 (m)                    |
| 3                | 73.6                | 3.13 (m)                          | 73.6                | 3.14-3.23 (m)                    |
| 4                | 33.9                | 1.24-1.37 (m, Hax); 2.04 (m, Heq) | 33.9                | 1.28-1.40 (m); 2.04-2.11 (m)     |
| 5                | 32.0                | 1.24-1.37 (m, Hax); 1.71 (m, Heq) | 31.9                | 1.28-1.40 (m); 1.71-1.77 (m)     |
| 6                | 58.6                | 3.16 (m)                          | 58.6                | 3.14-3.23 (m)                    |
| 1'               | 135.2               | 5.57 (dd, $J = 15.2, 7.2$ Hz)     | 135.0               | 5.66-5.73 (m)                    |
| 2'               | 130.1               | 6.13 (m)                          | 130.1               | 5.98-6.11 (m)                    |
| 3'               | 130.4               | 6.14 (m)                          | 130.4               | 6.11-6.22 (m)                    |
| 4'               | 132.9               | 6.15 (m)                          | 132.9               | 6.11-6.22 (m)                    |
| 5'               | 129.9               | 6.04 (m)                          | 129.8               | 5.98-6.11 (m)                    |
| 6'               | 135.6               | 5.67 (dt, $J = 15.2, 7.2$ Hz)     | 135.6               | 5.60 (dd, $J = 15.2, 7.1$ Hz)    |
| 7'               | 32.5                | 2.07 (q, $J = 7.2$ Hz)            | 32.4                | 2.04-2.11 (m)                    |
| 8'               | 31.4                | 1.36 (m)                          | 31.4                | 1.28-1.40 (m)                    |
| 9'               | 22.2                | 1.34 (m)                          | 22.2                | 1.28-1.40 (m)                    |
| 10'              | 13.9                | 0.86 (t, $J = 6.8$ Hz)            | 13.9                | 0.89 (t, $J = 7.1$ Hz)           |
| $\text{CH}_3$ -2 | 19.0                | 1.17 (d, $J = 6.4$ Hz)            | 18.9                | 1.20 (d, $J = 6.1$ Hz)           |

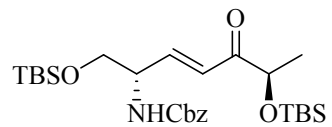

11

<sup>1</sup>H NMR (400 MHz, CDCl<sub>3</sub>)

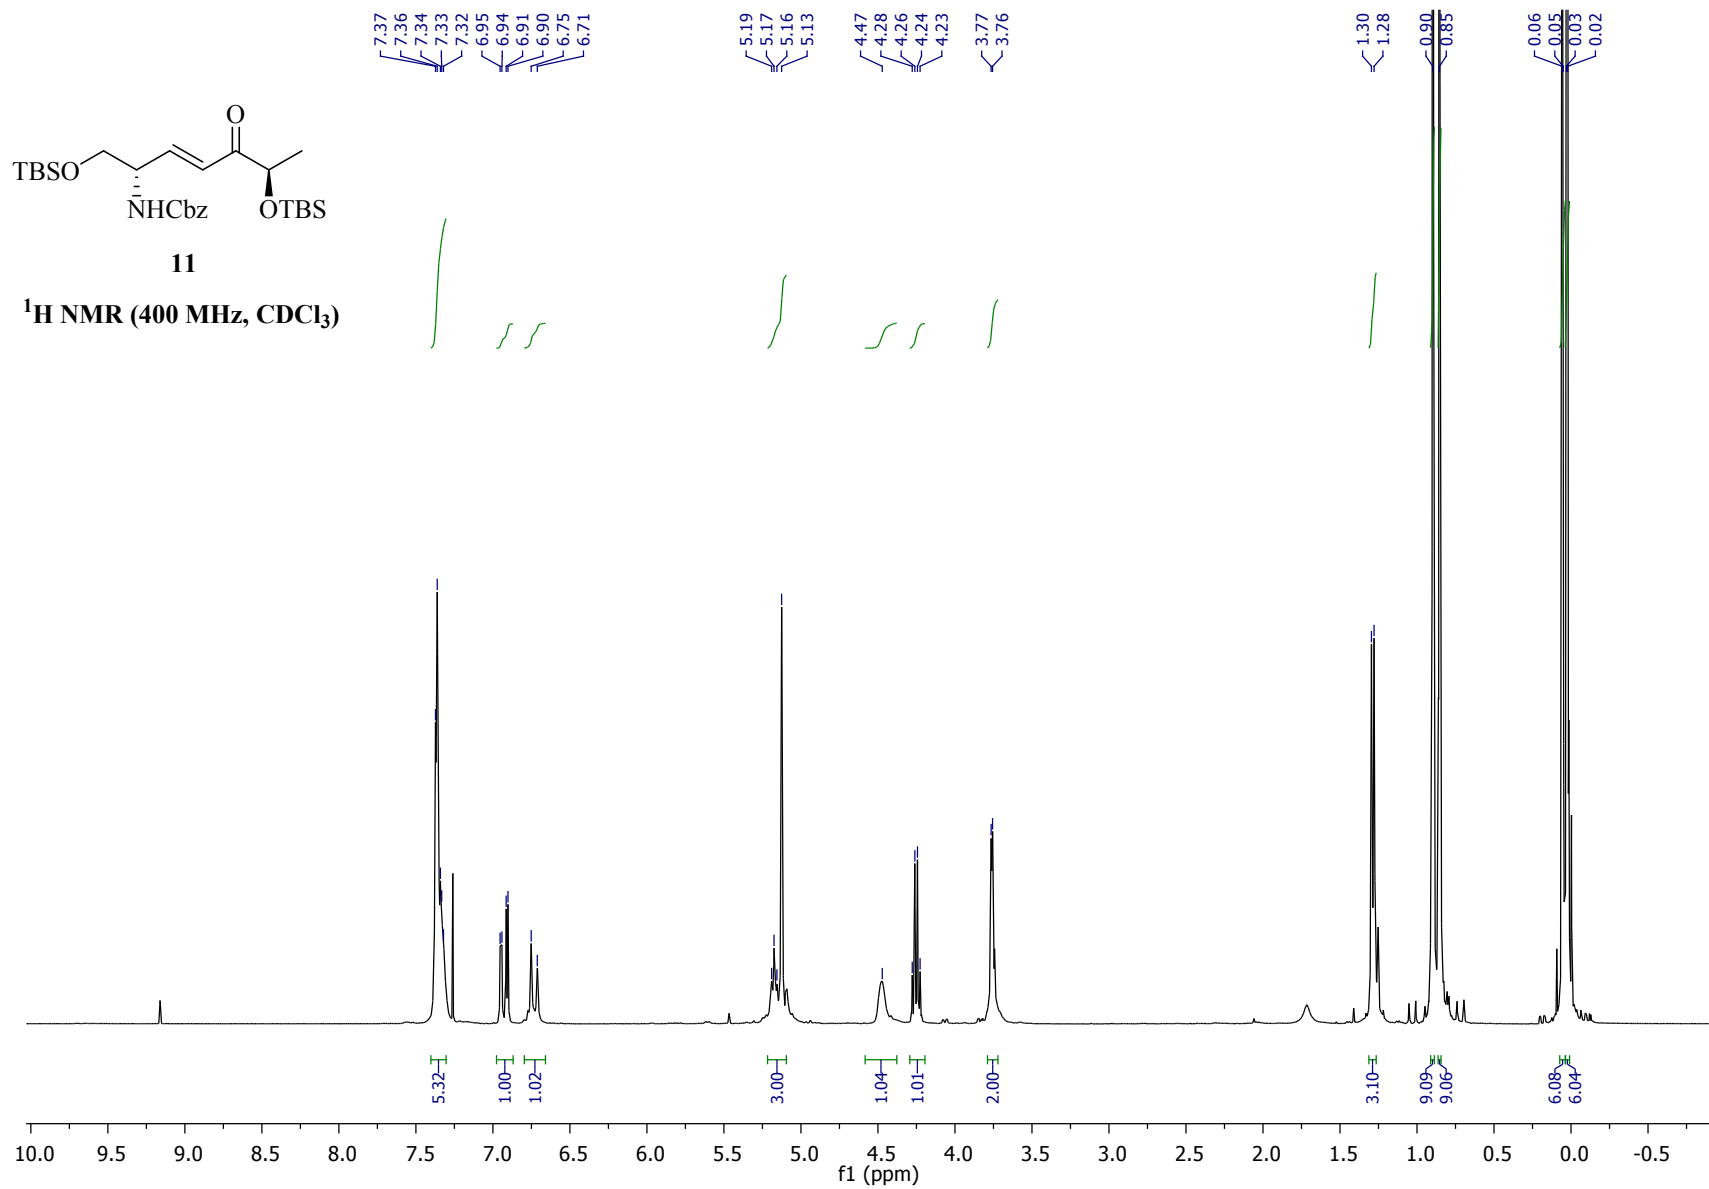

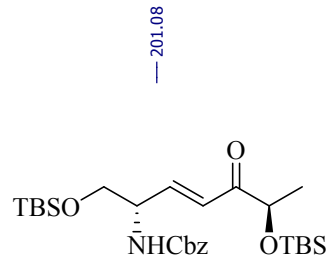

11

$^{13}\text{C}$  NMR (100 MHz,  $\text{CDCl}_3$ )

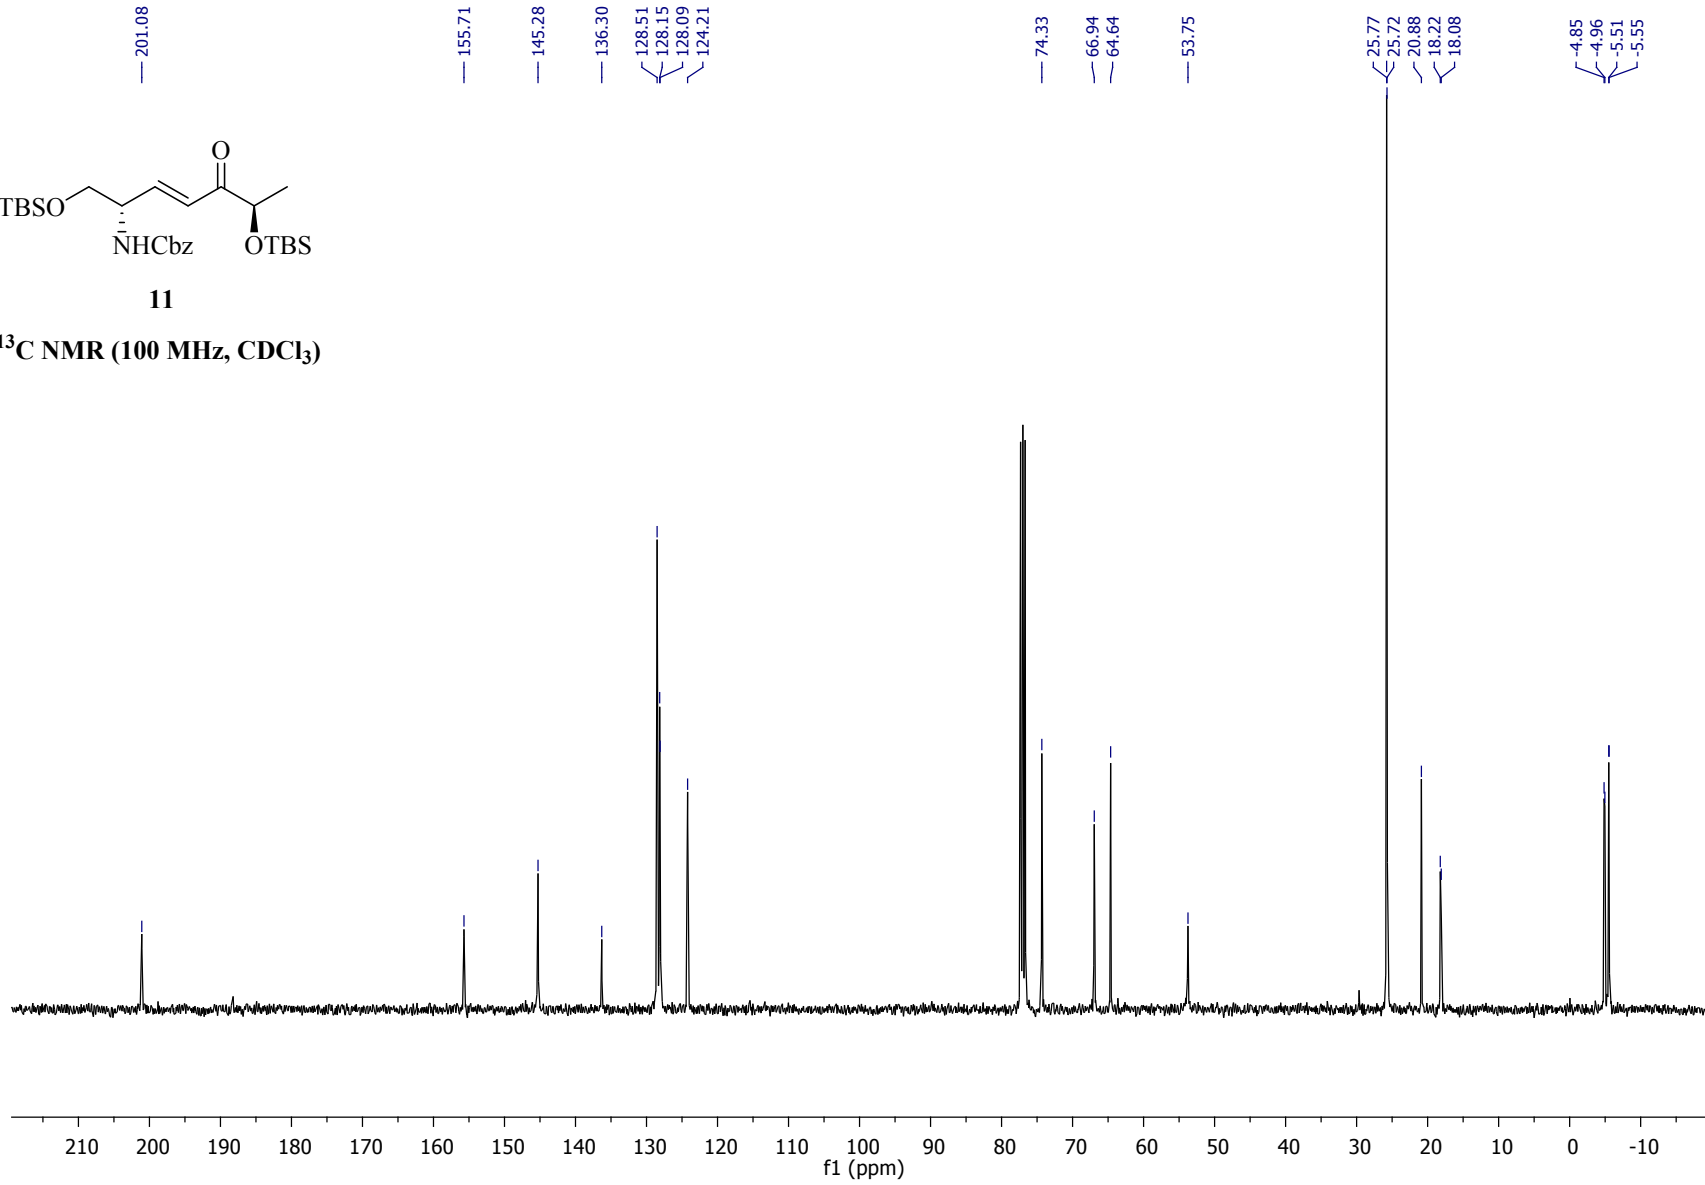

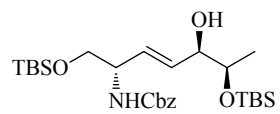

12

<sup>1</sup>H NMR (500 MHz, CDCl<sub>3</sub>)

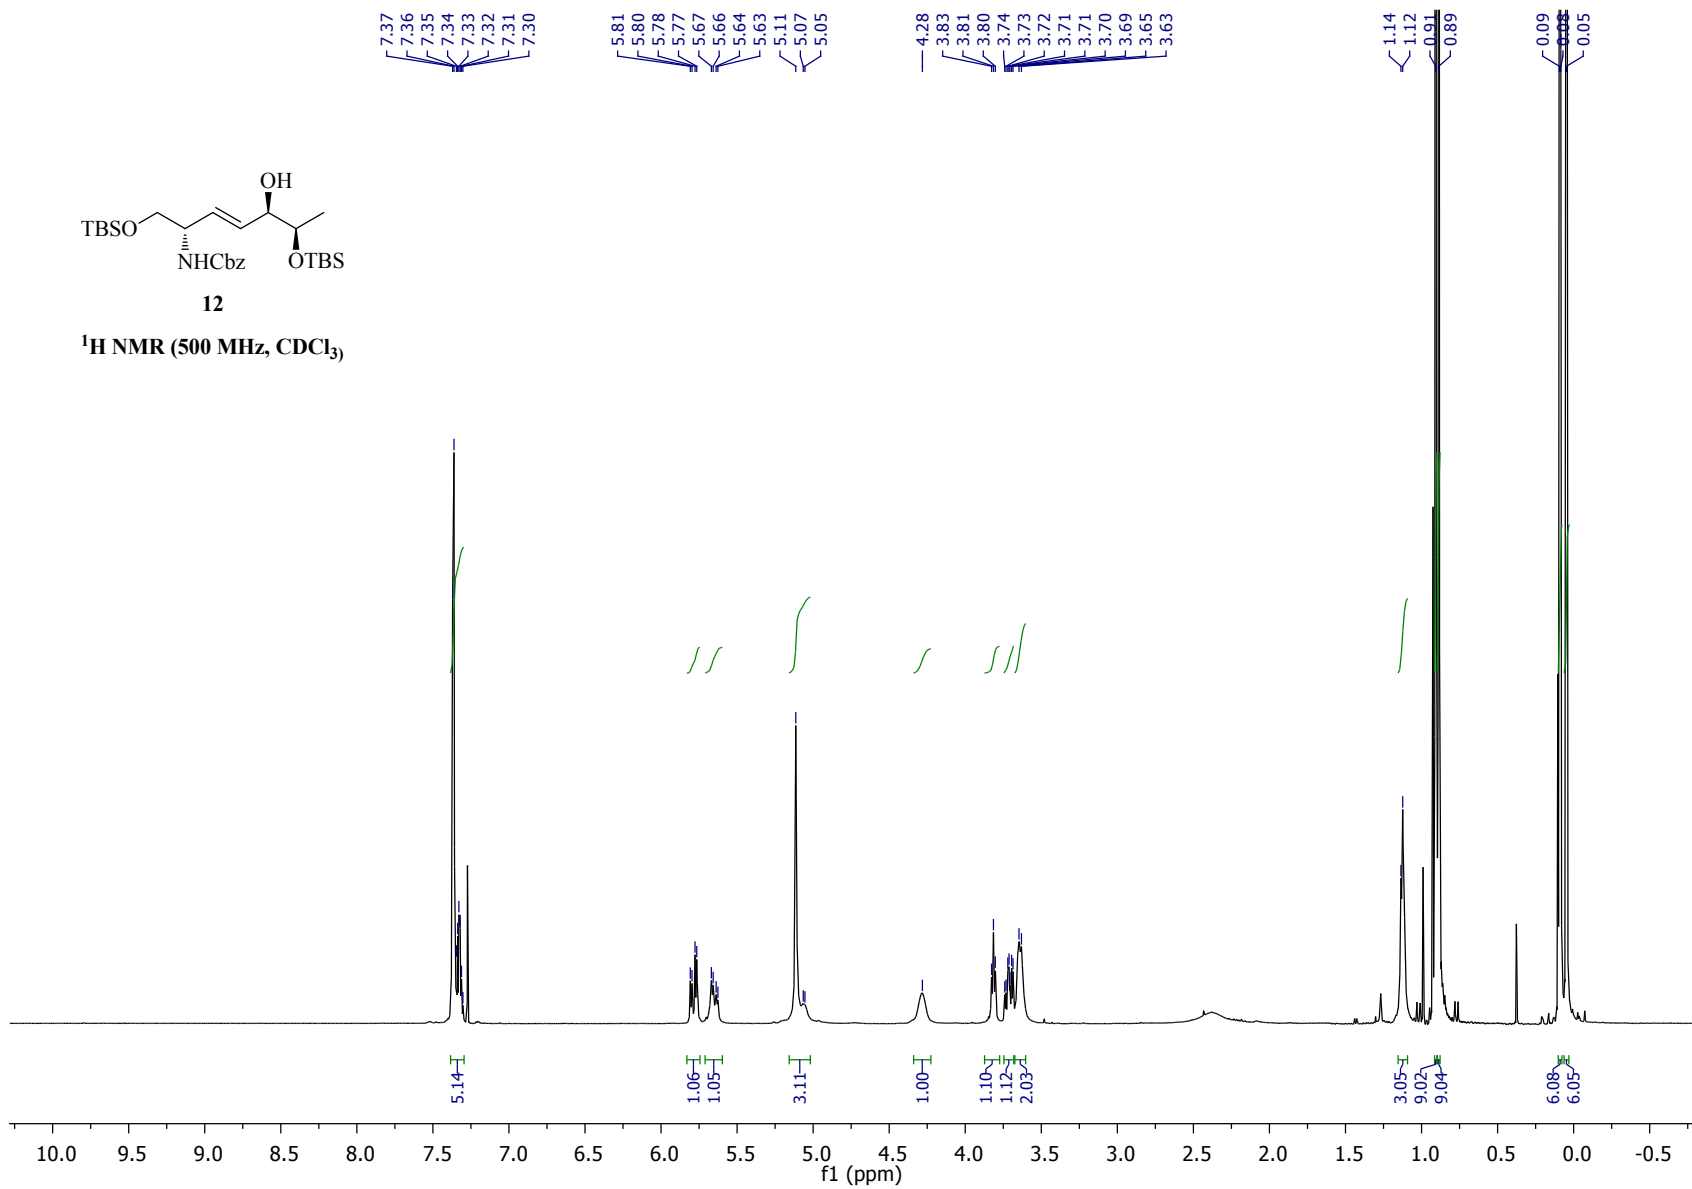









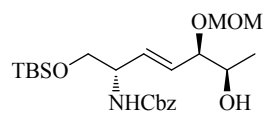

14

<sup>1</sup>H NMR (400 MHz, CDCl<sub>3</sub>)

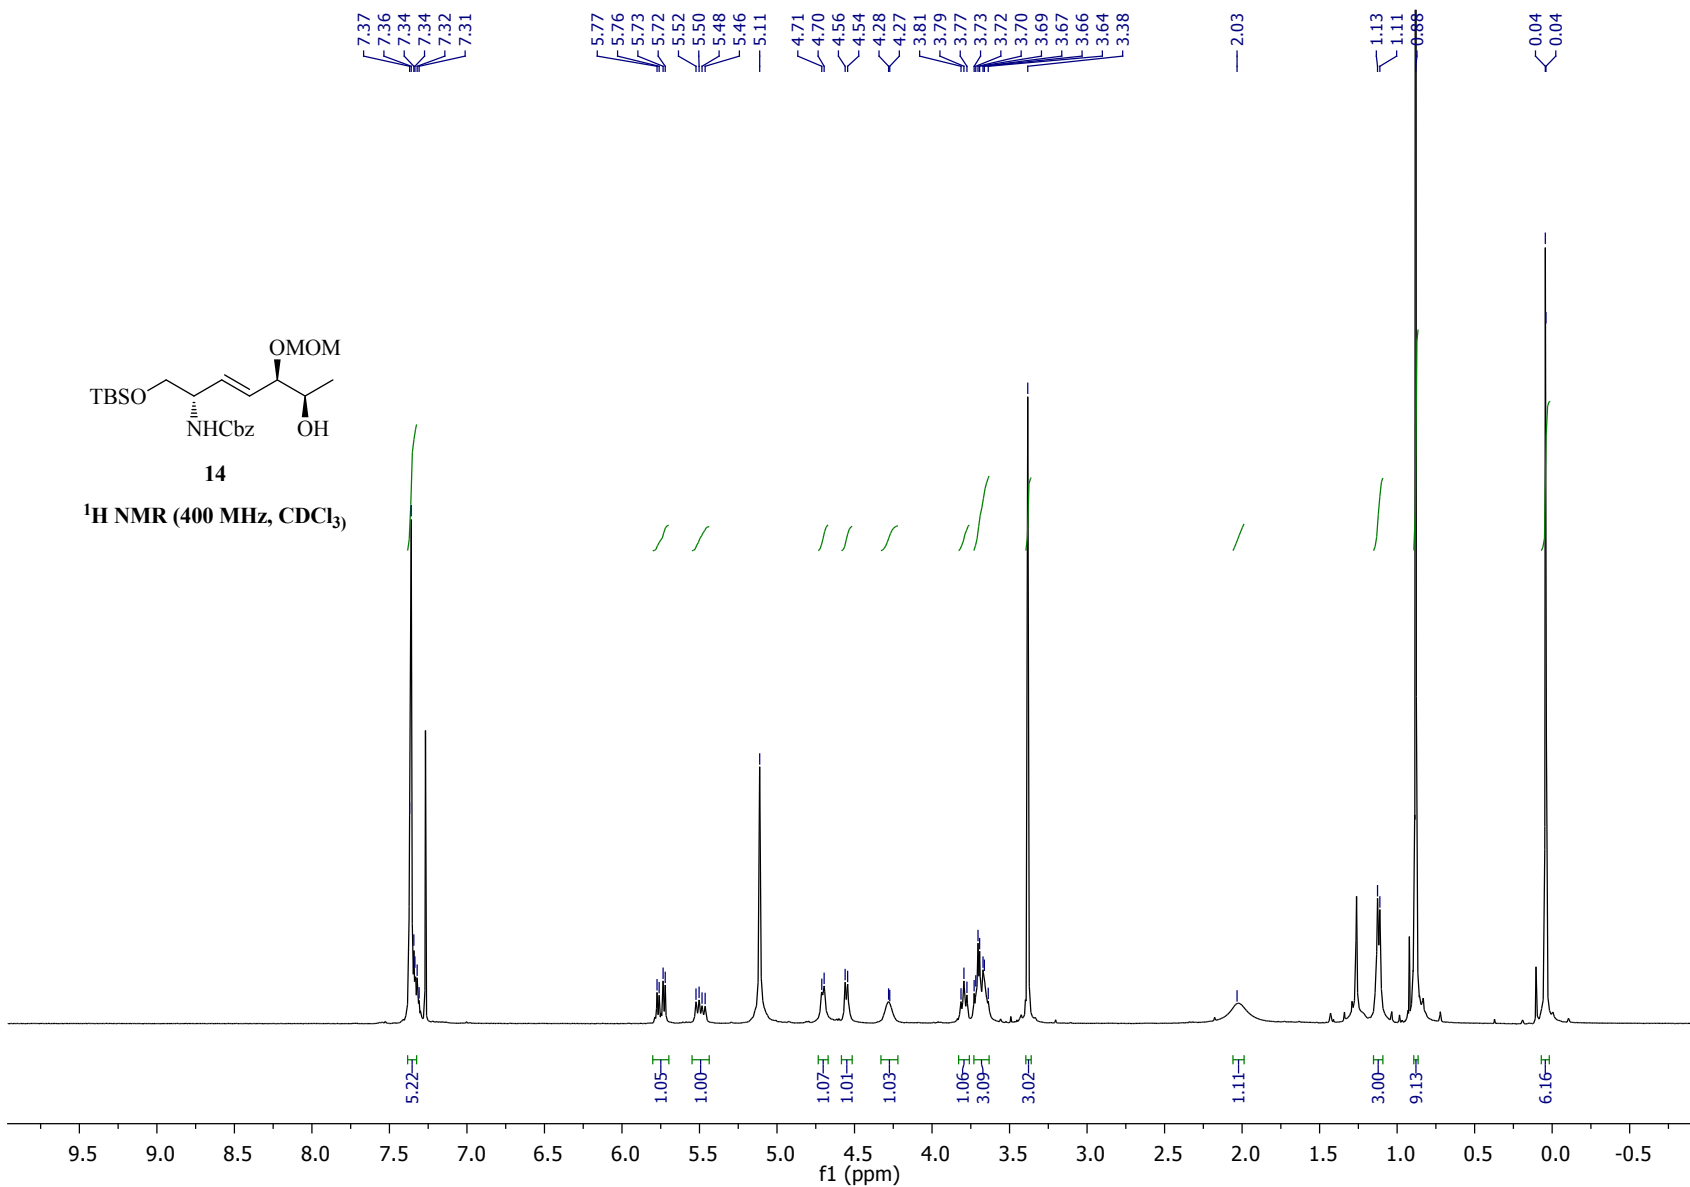

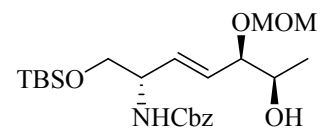

14

$^{13}\text{C}$  NMR (100 MHz,  $\text{CDCl}_3$ )

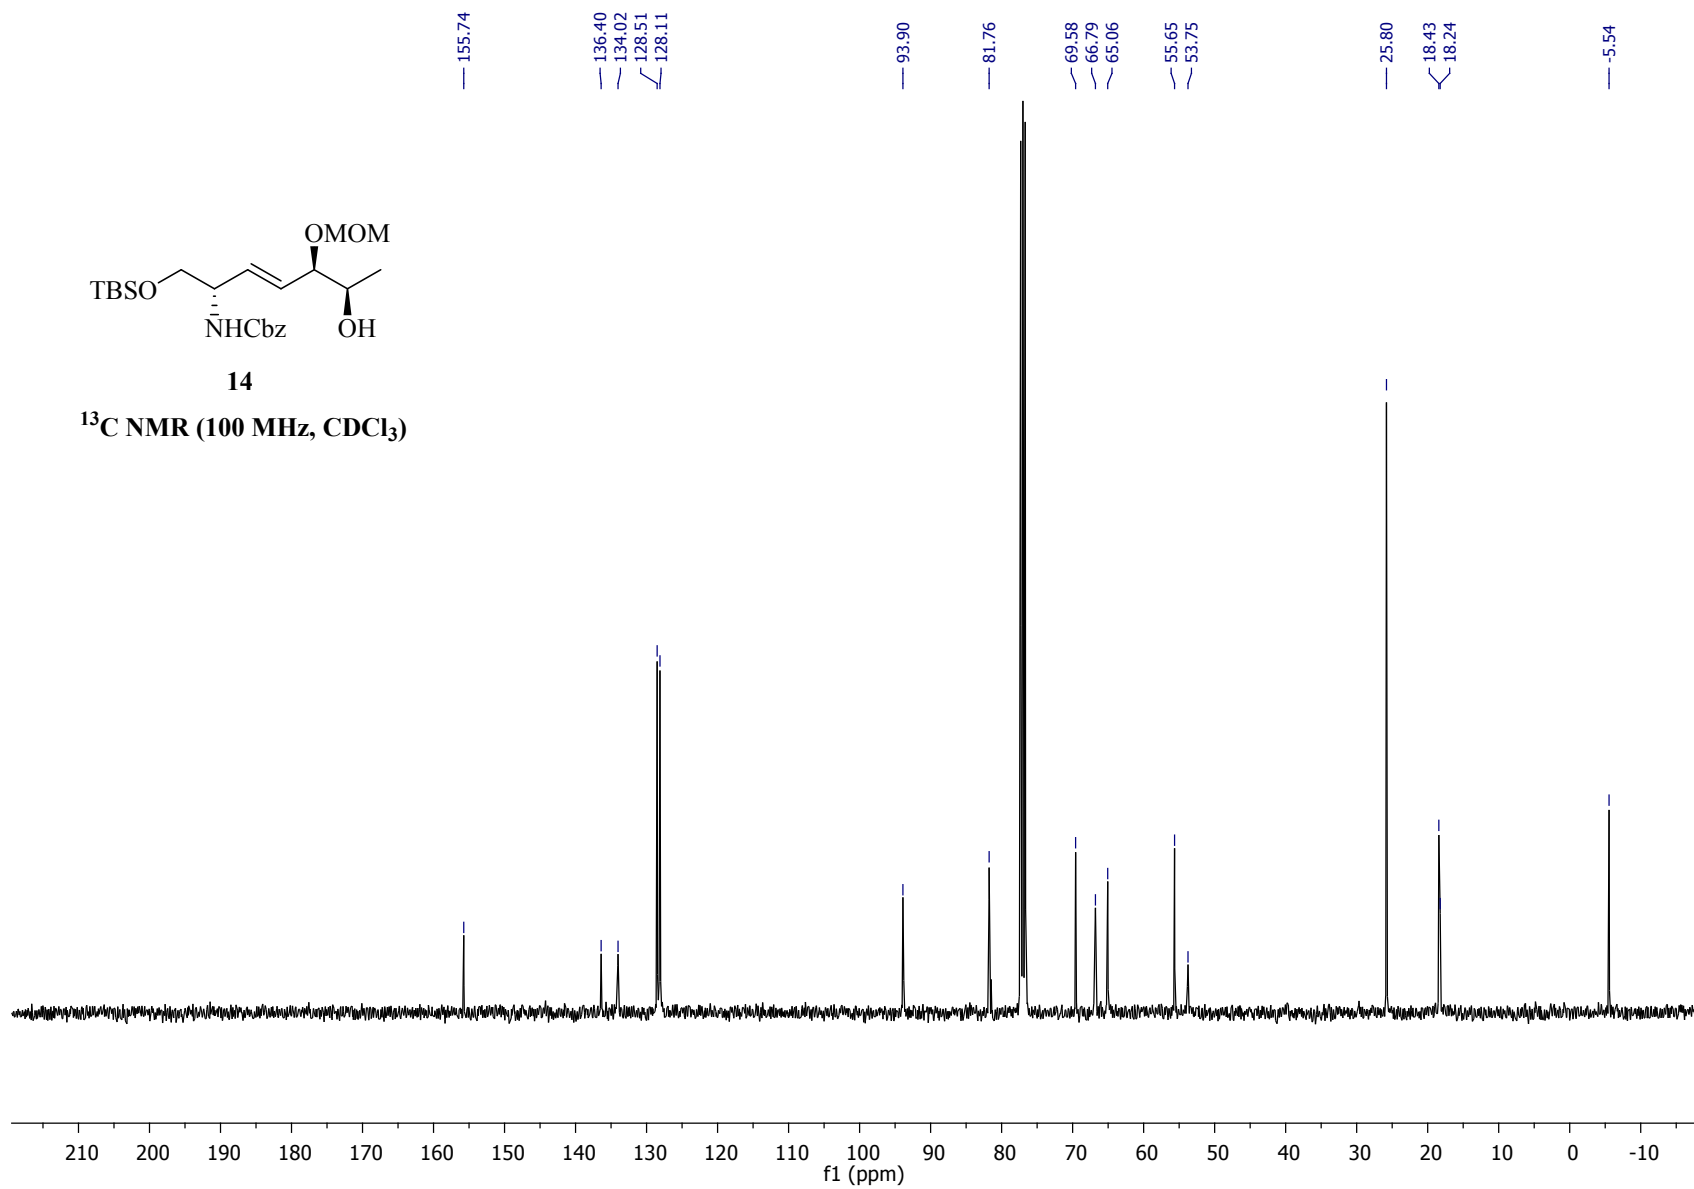

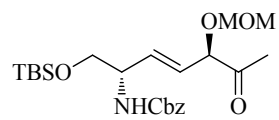

14-I

$^1\text{H NMR}$  (500 MHz,  $\text{CDCl}_3$ )

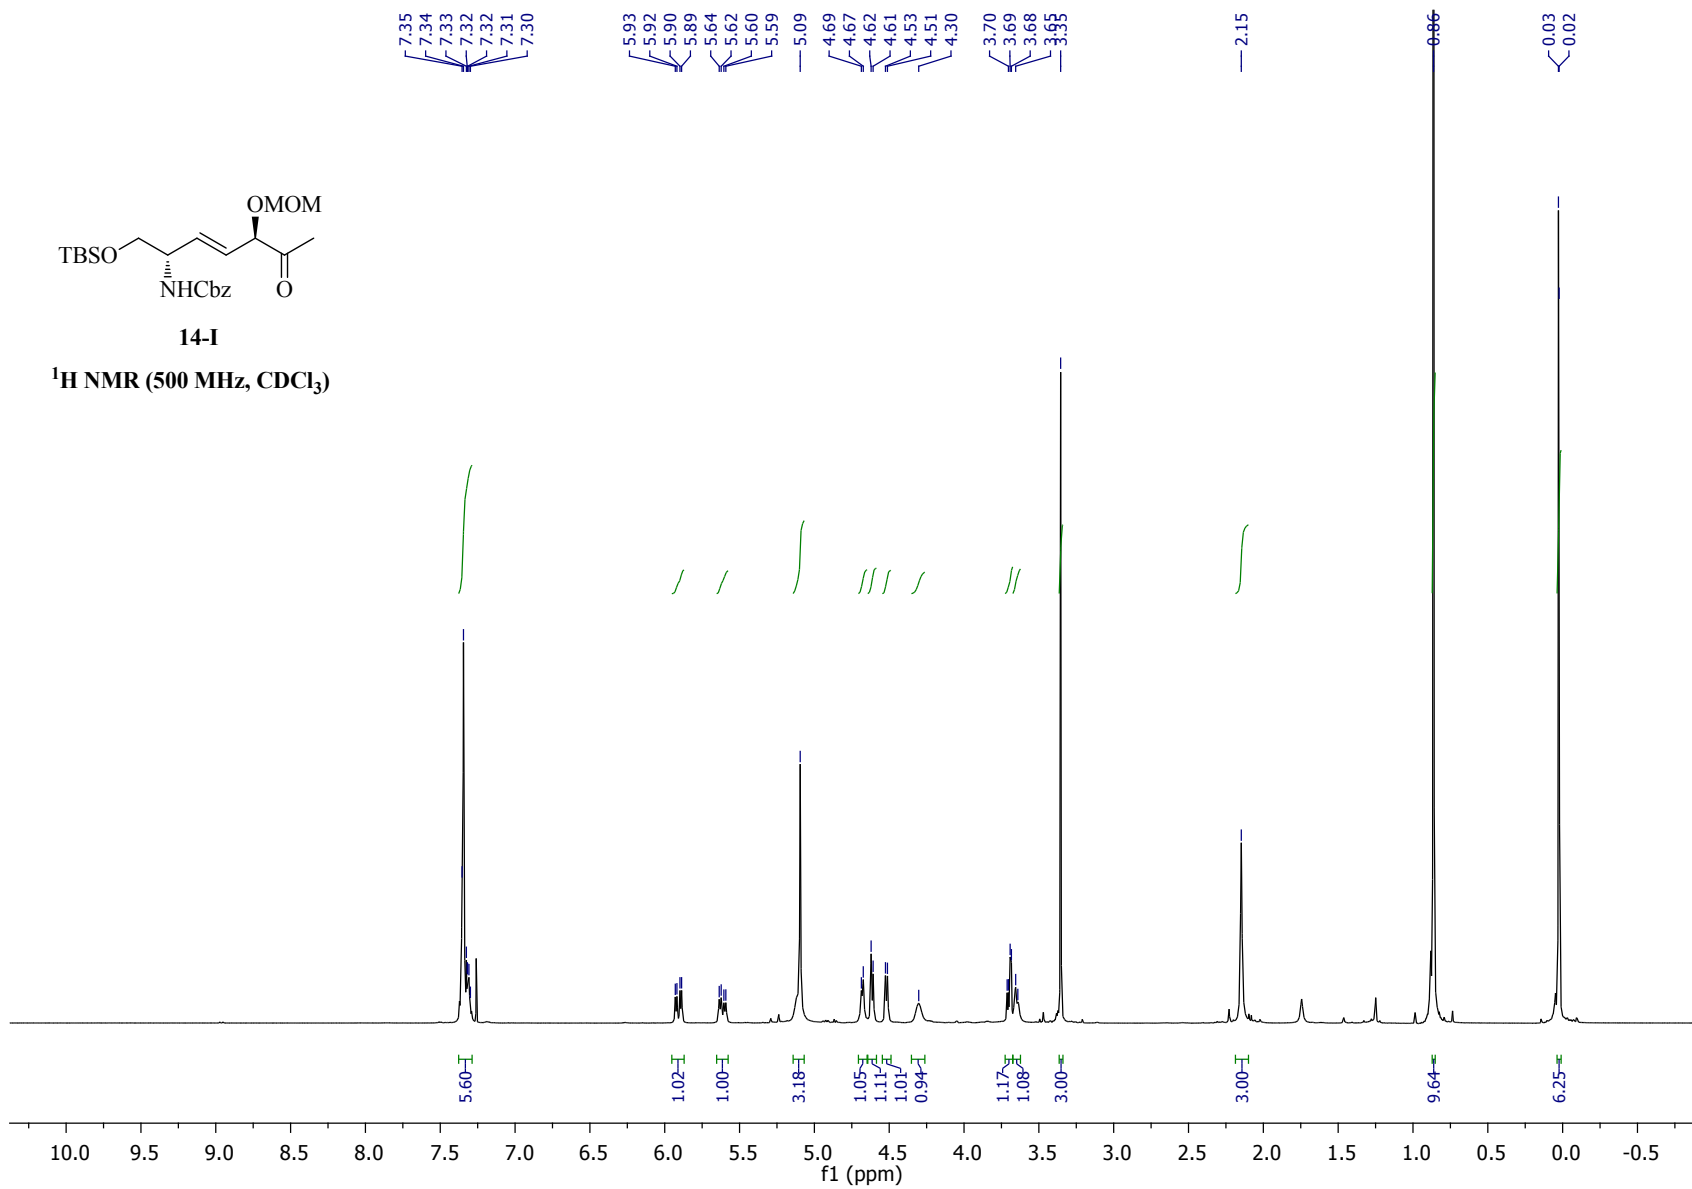

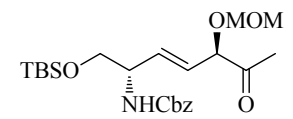

14-I

<sup>13</sup>C NMR (125 MHz, CDCl<sub>3</sub>)

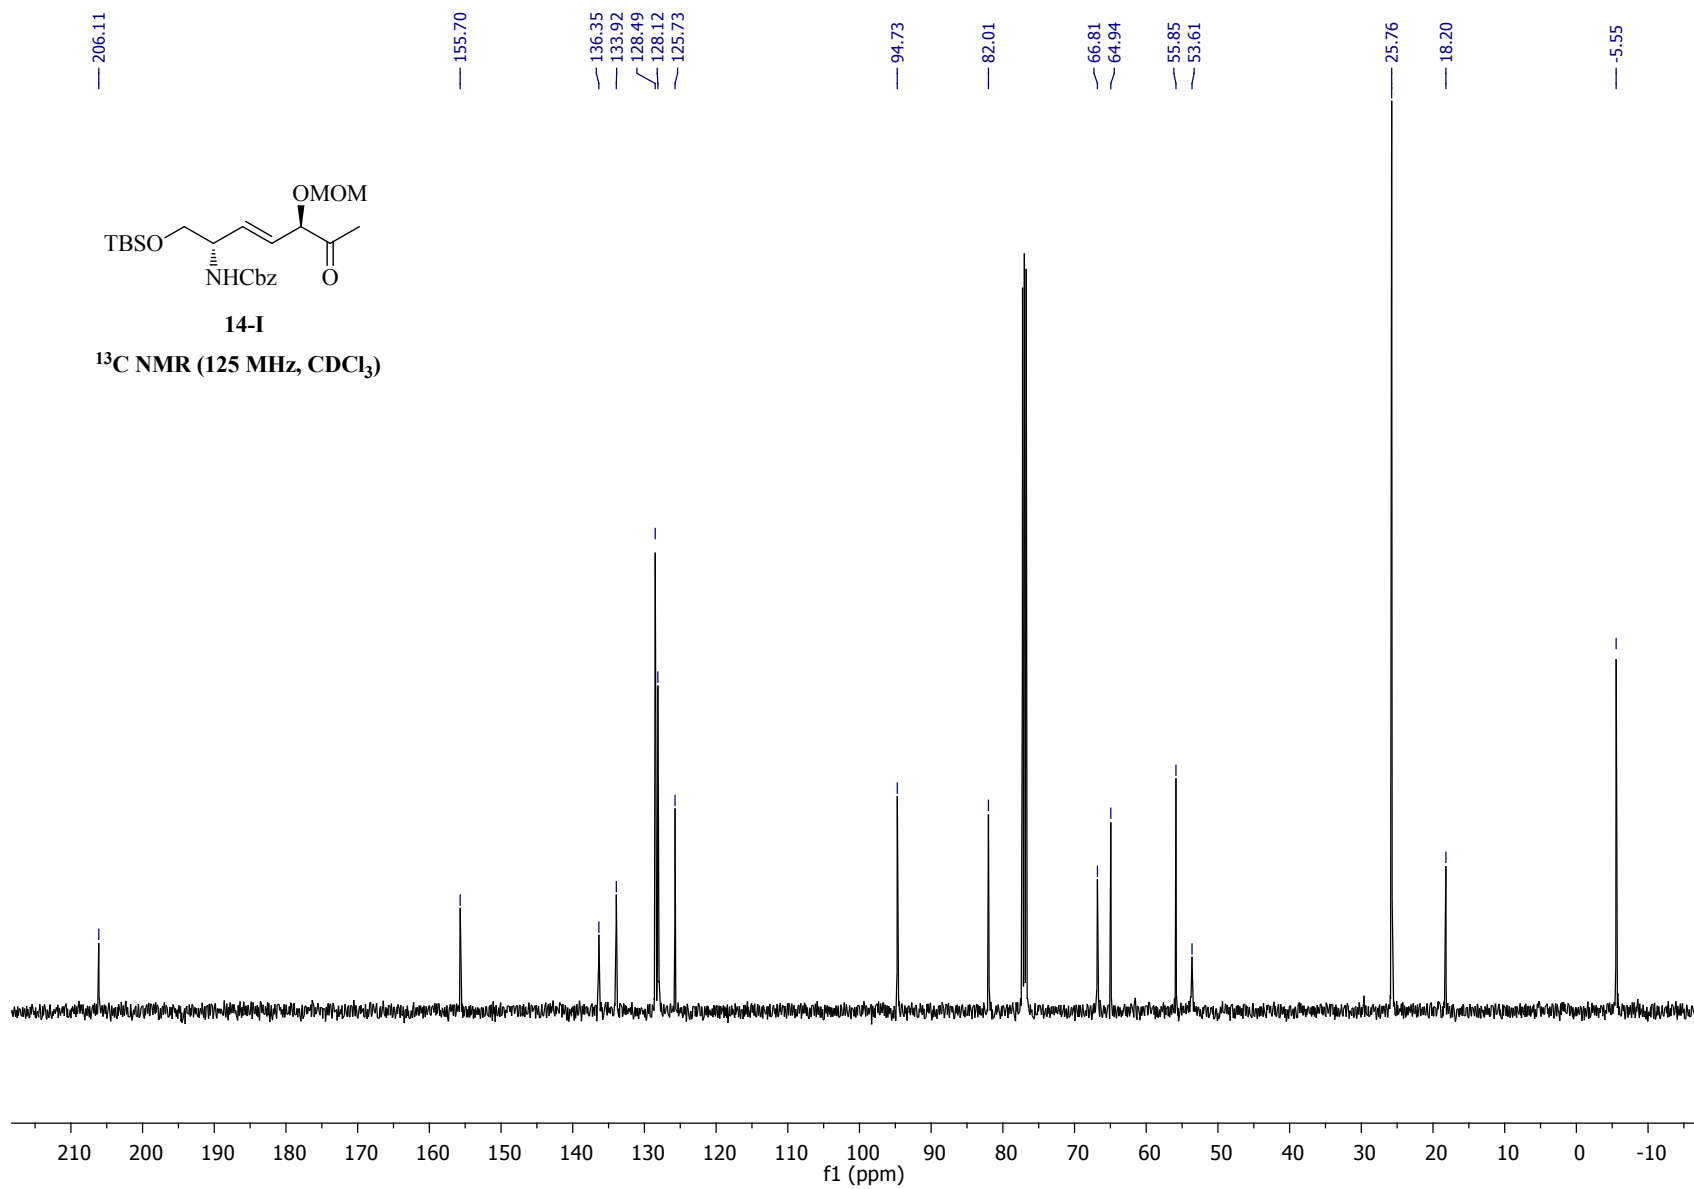







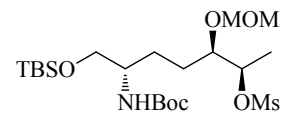

**16**

<sup>1</sup>H NMR (400 MHz, CDCl<sub>3</sub>)

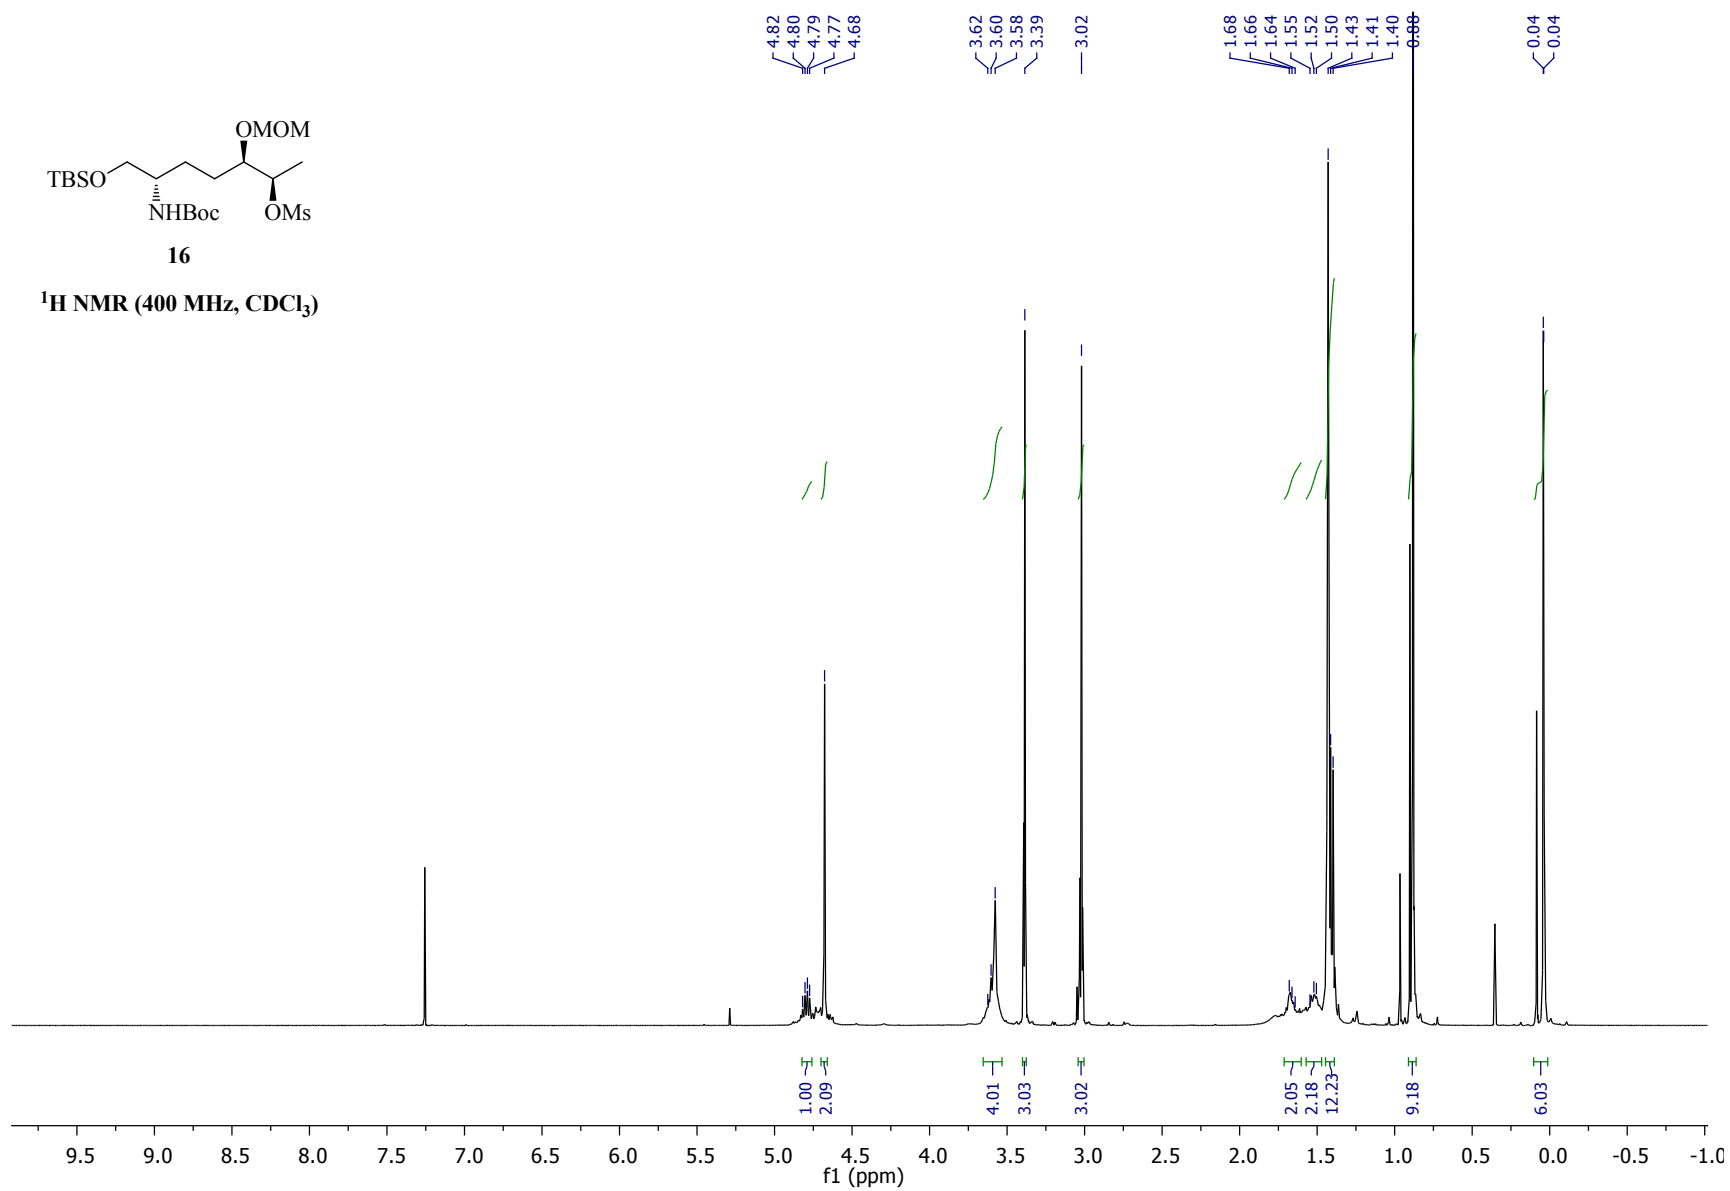

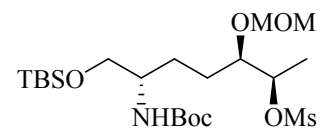

**16**

$^{13}\text{C}$  NMR (100 MHz,  $\text{CDCl}_3$ )

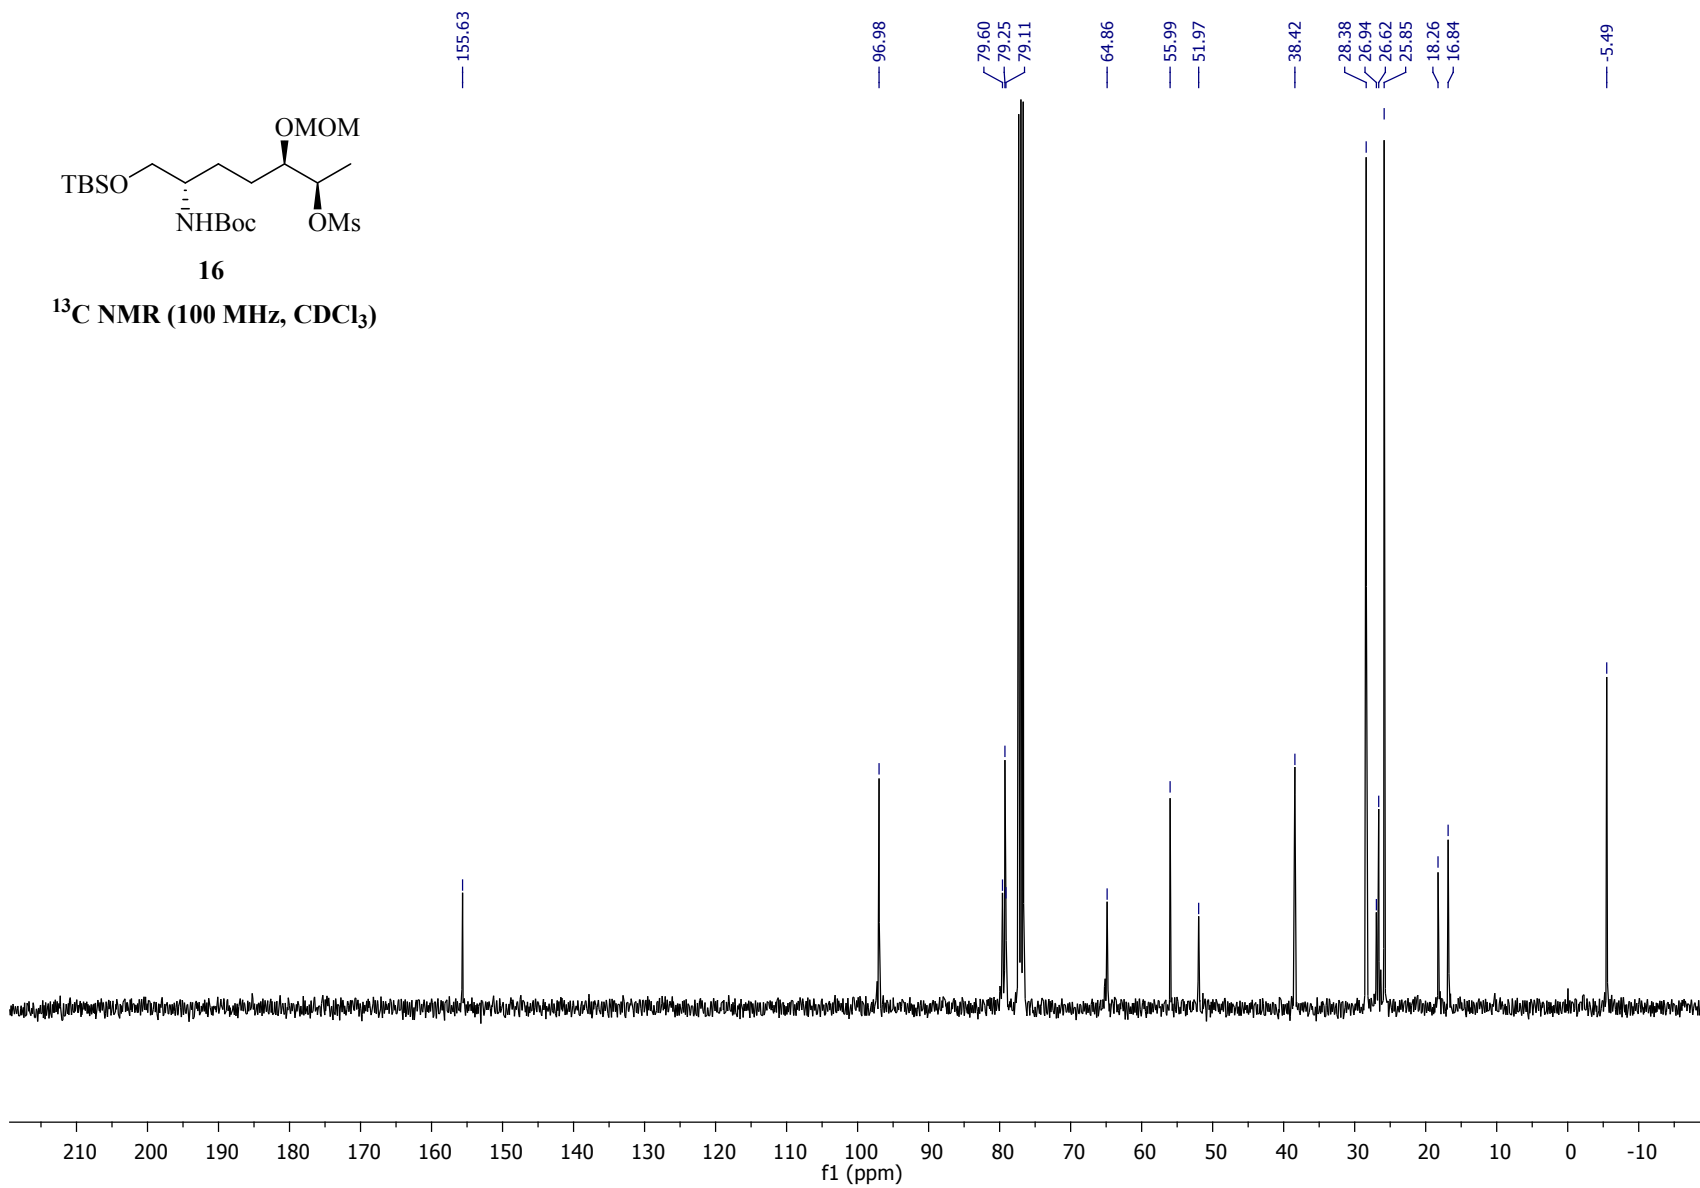

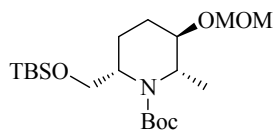

17

$^1\text{H NMR}$  (300 MHz,  $\text{CDCl}_3$ )

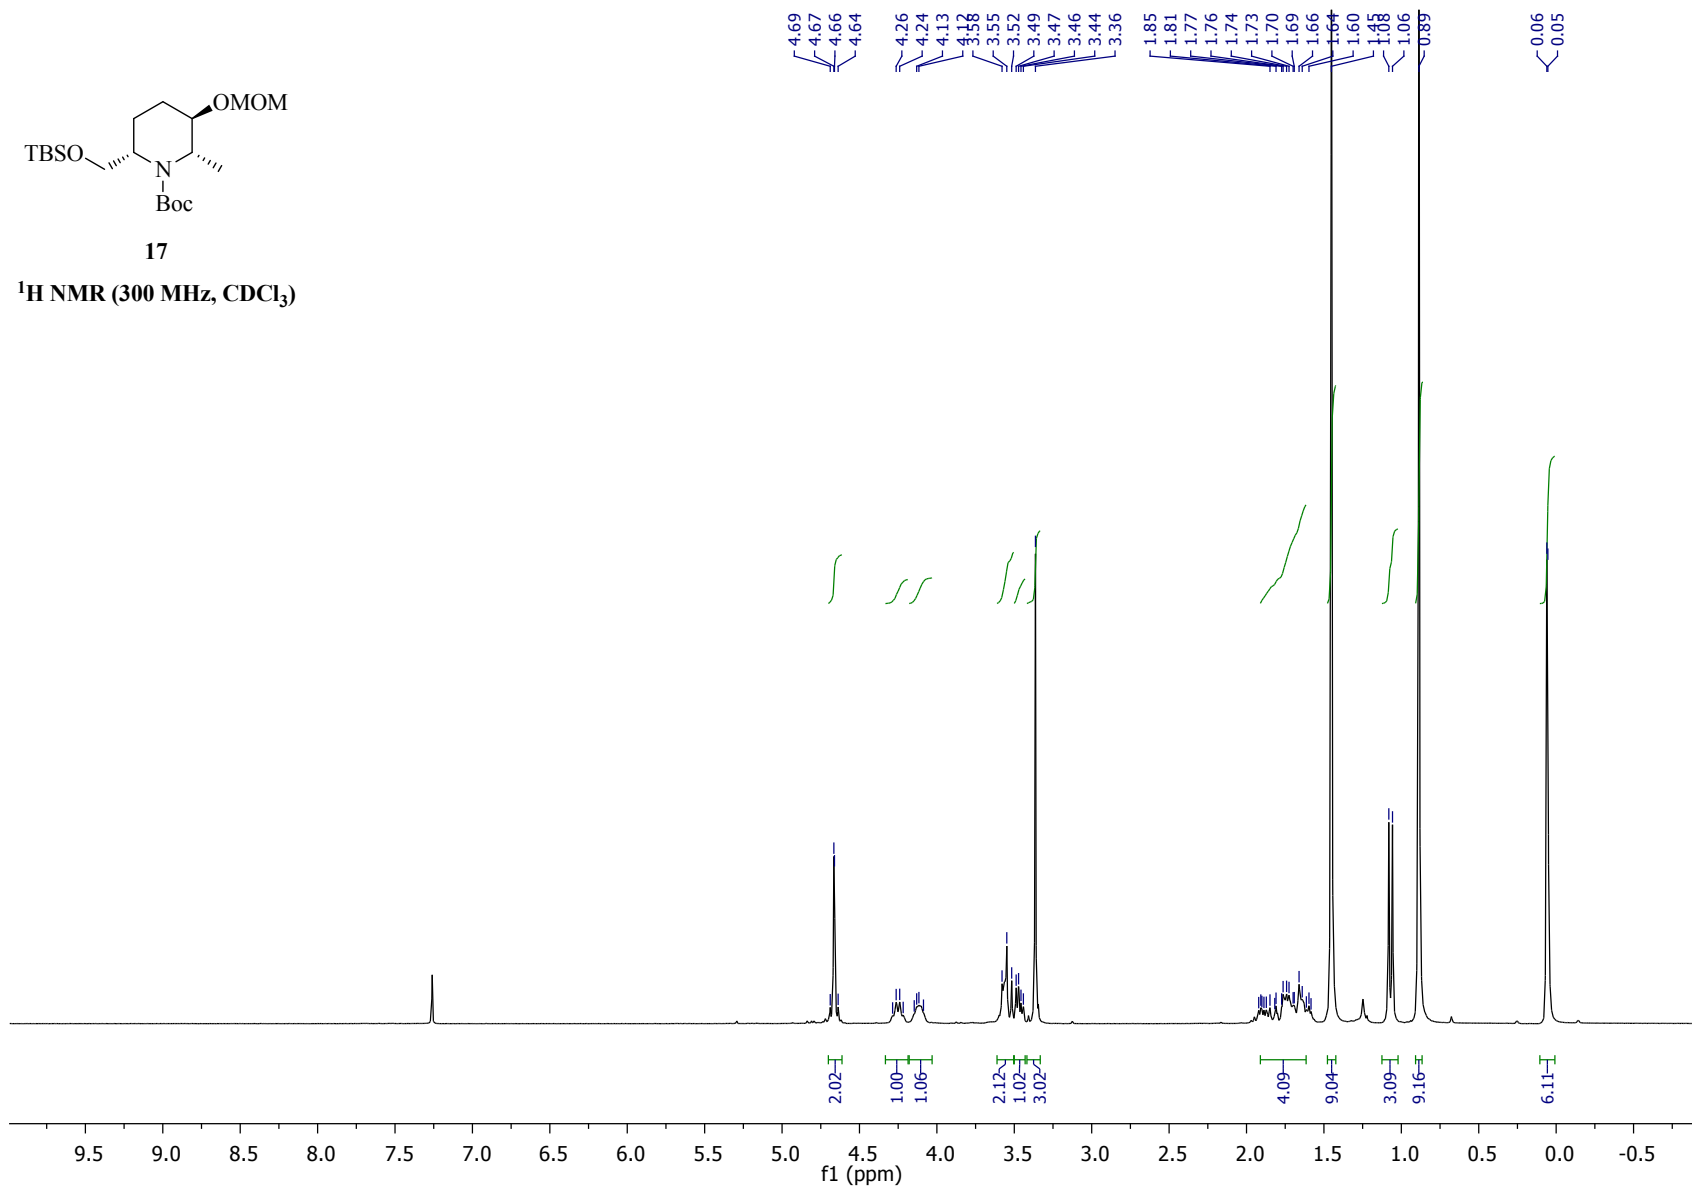

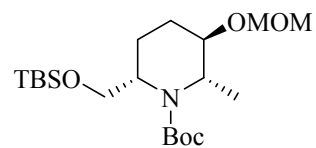

17

$^{13}\text{C}$  NMR (75 MHz,  $\text{CDCl}_3$ )

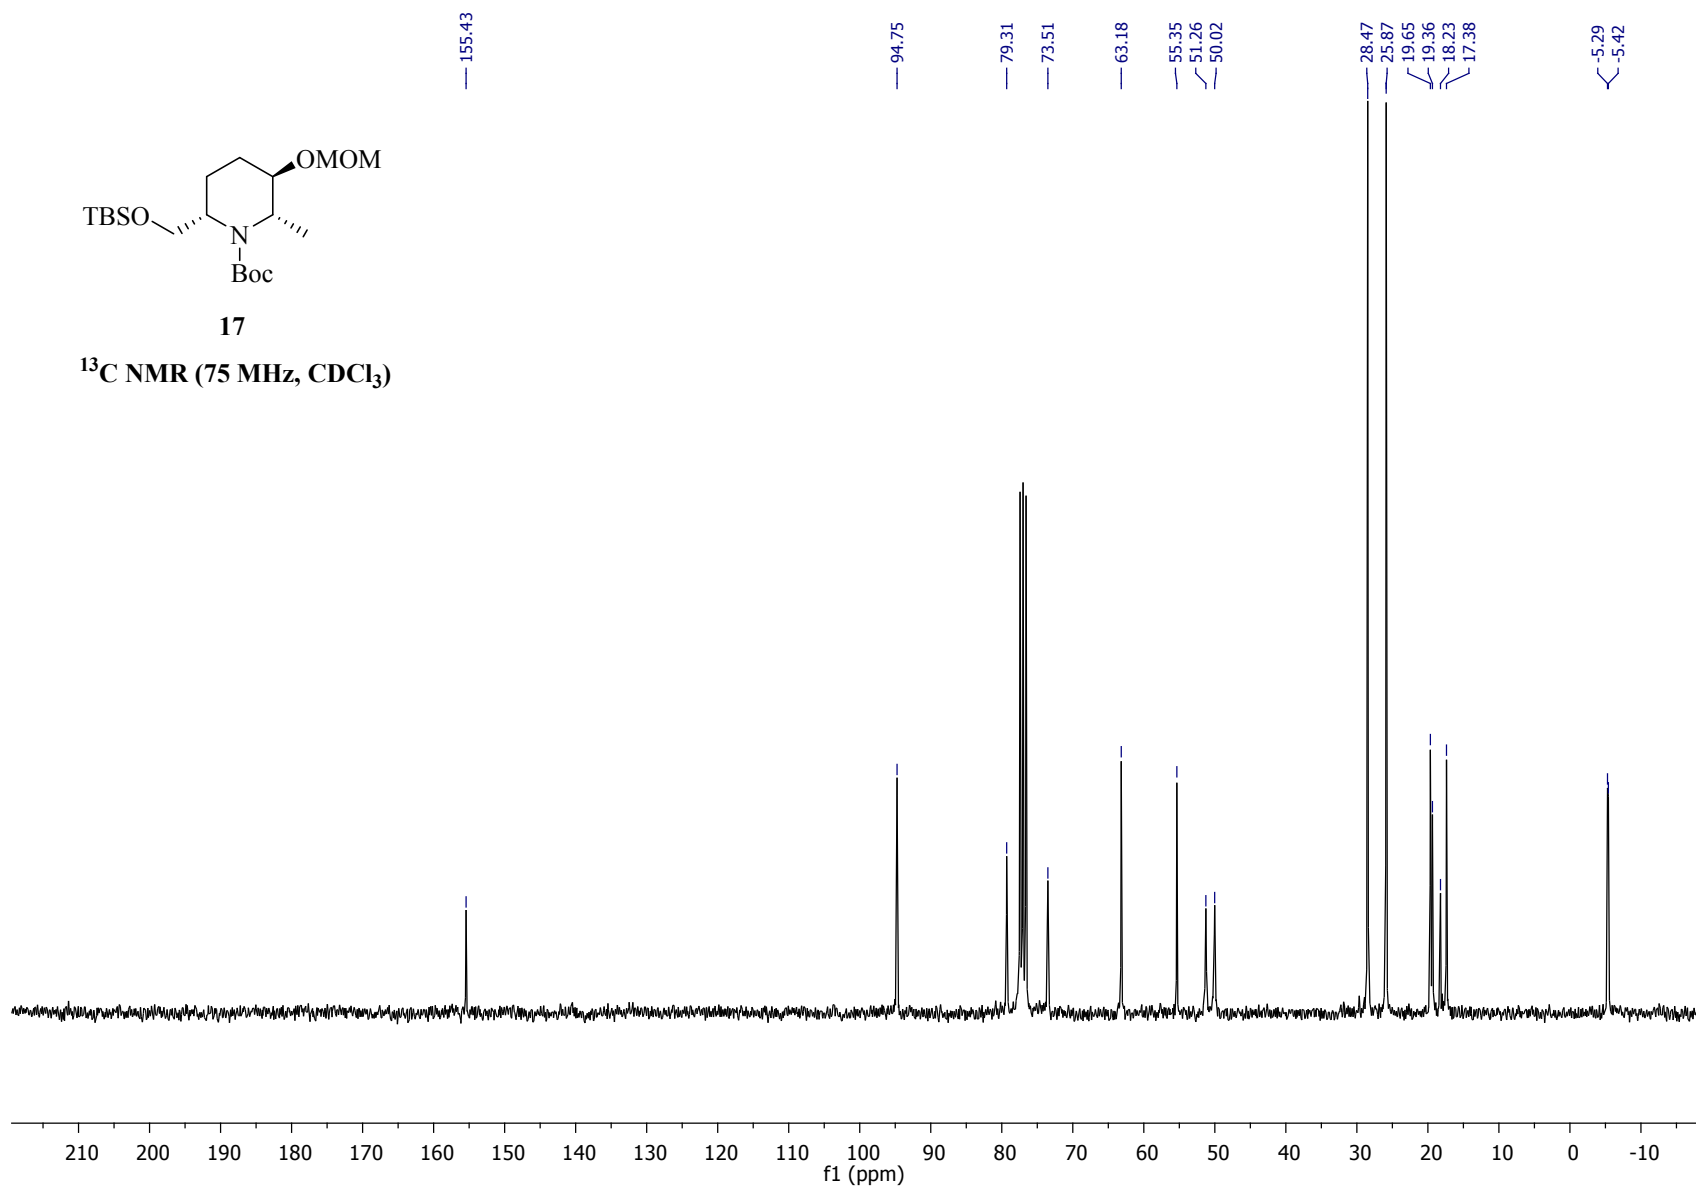

2D NOESY (Nuclear Overhauser effect spectroscopy) spectrum of compound **17** in DMSO-d<sub>6</sub> recorded on 600 MHz spectrometer.

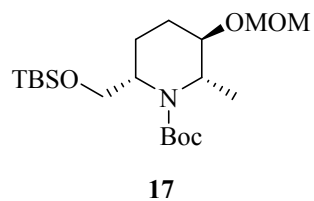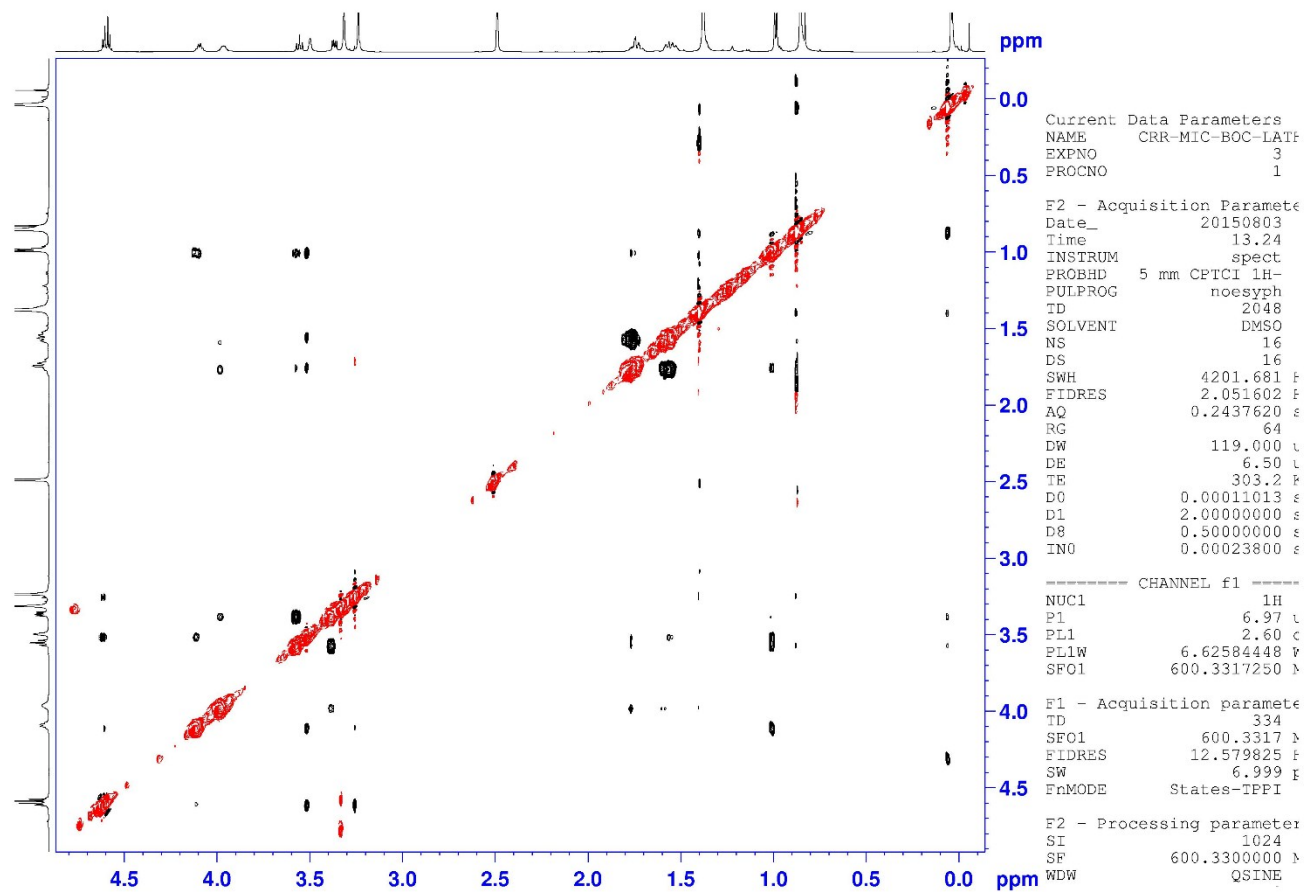

Expansions of 2D NOESY spectrum of compound **17** in DMSO-d<sub>6</sub> recorded on 600 MHz.

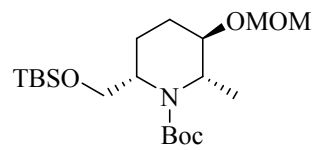

**17**

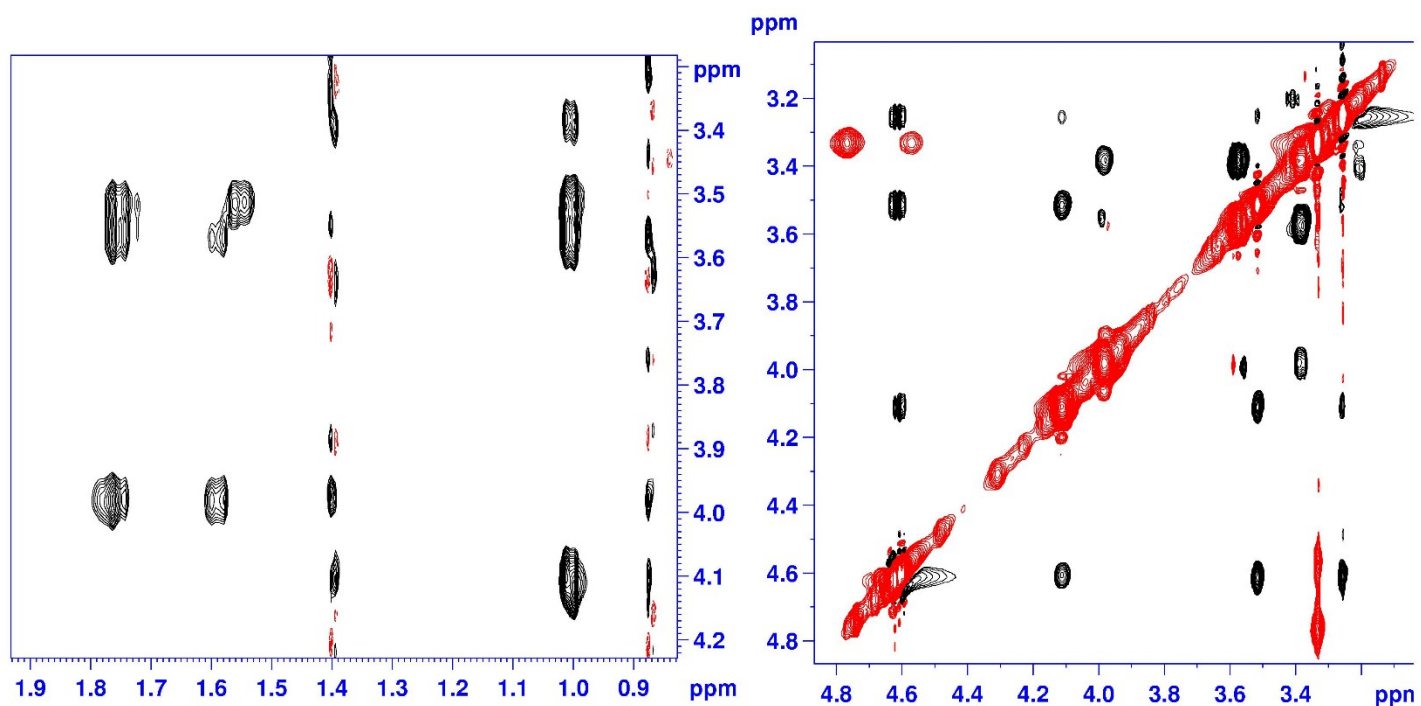

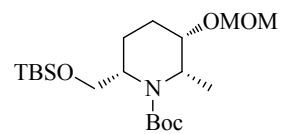

17a

$^1\text{H NMR}$  (300 MHz,  $\text{CDCl}_3$ )

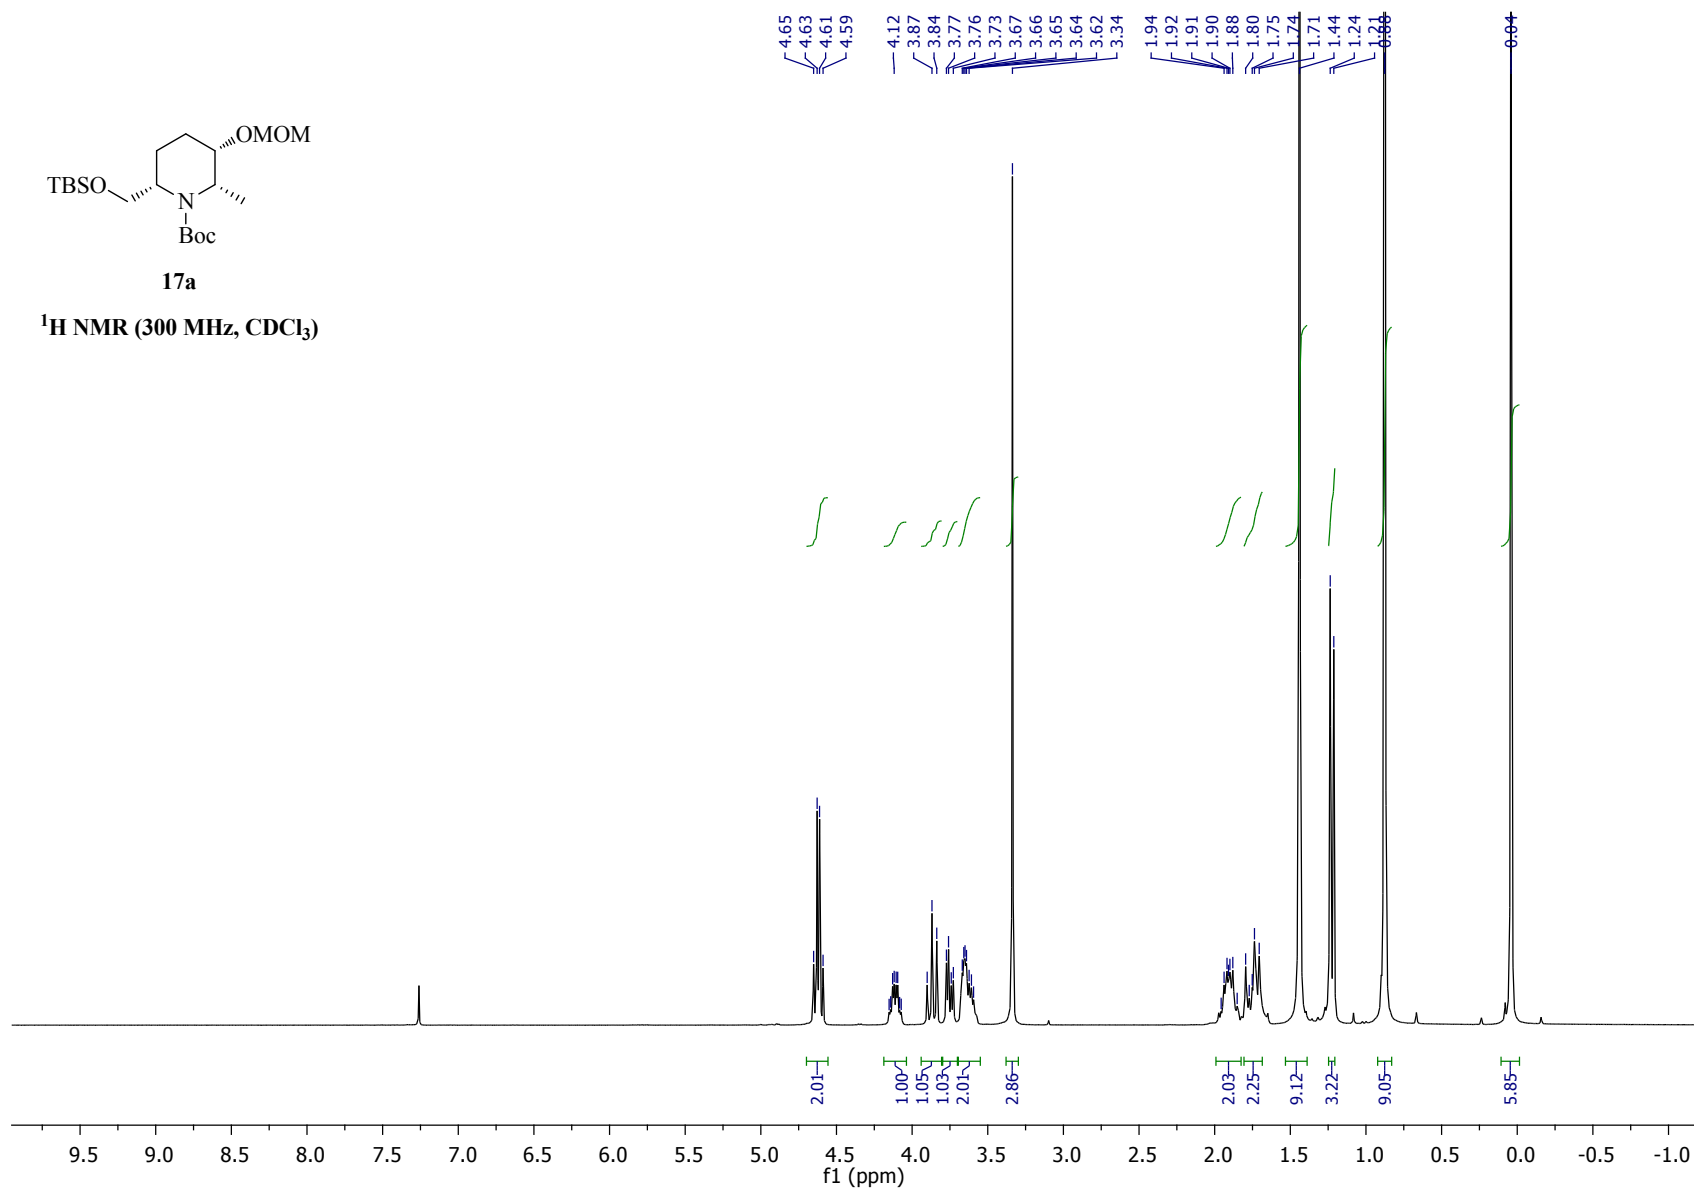

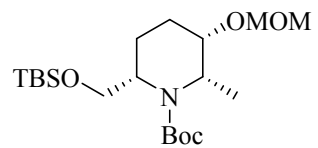

17a

$^{13}\text{C}$  NMR (75 MHz,  $\text{CDCl}_3$ )

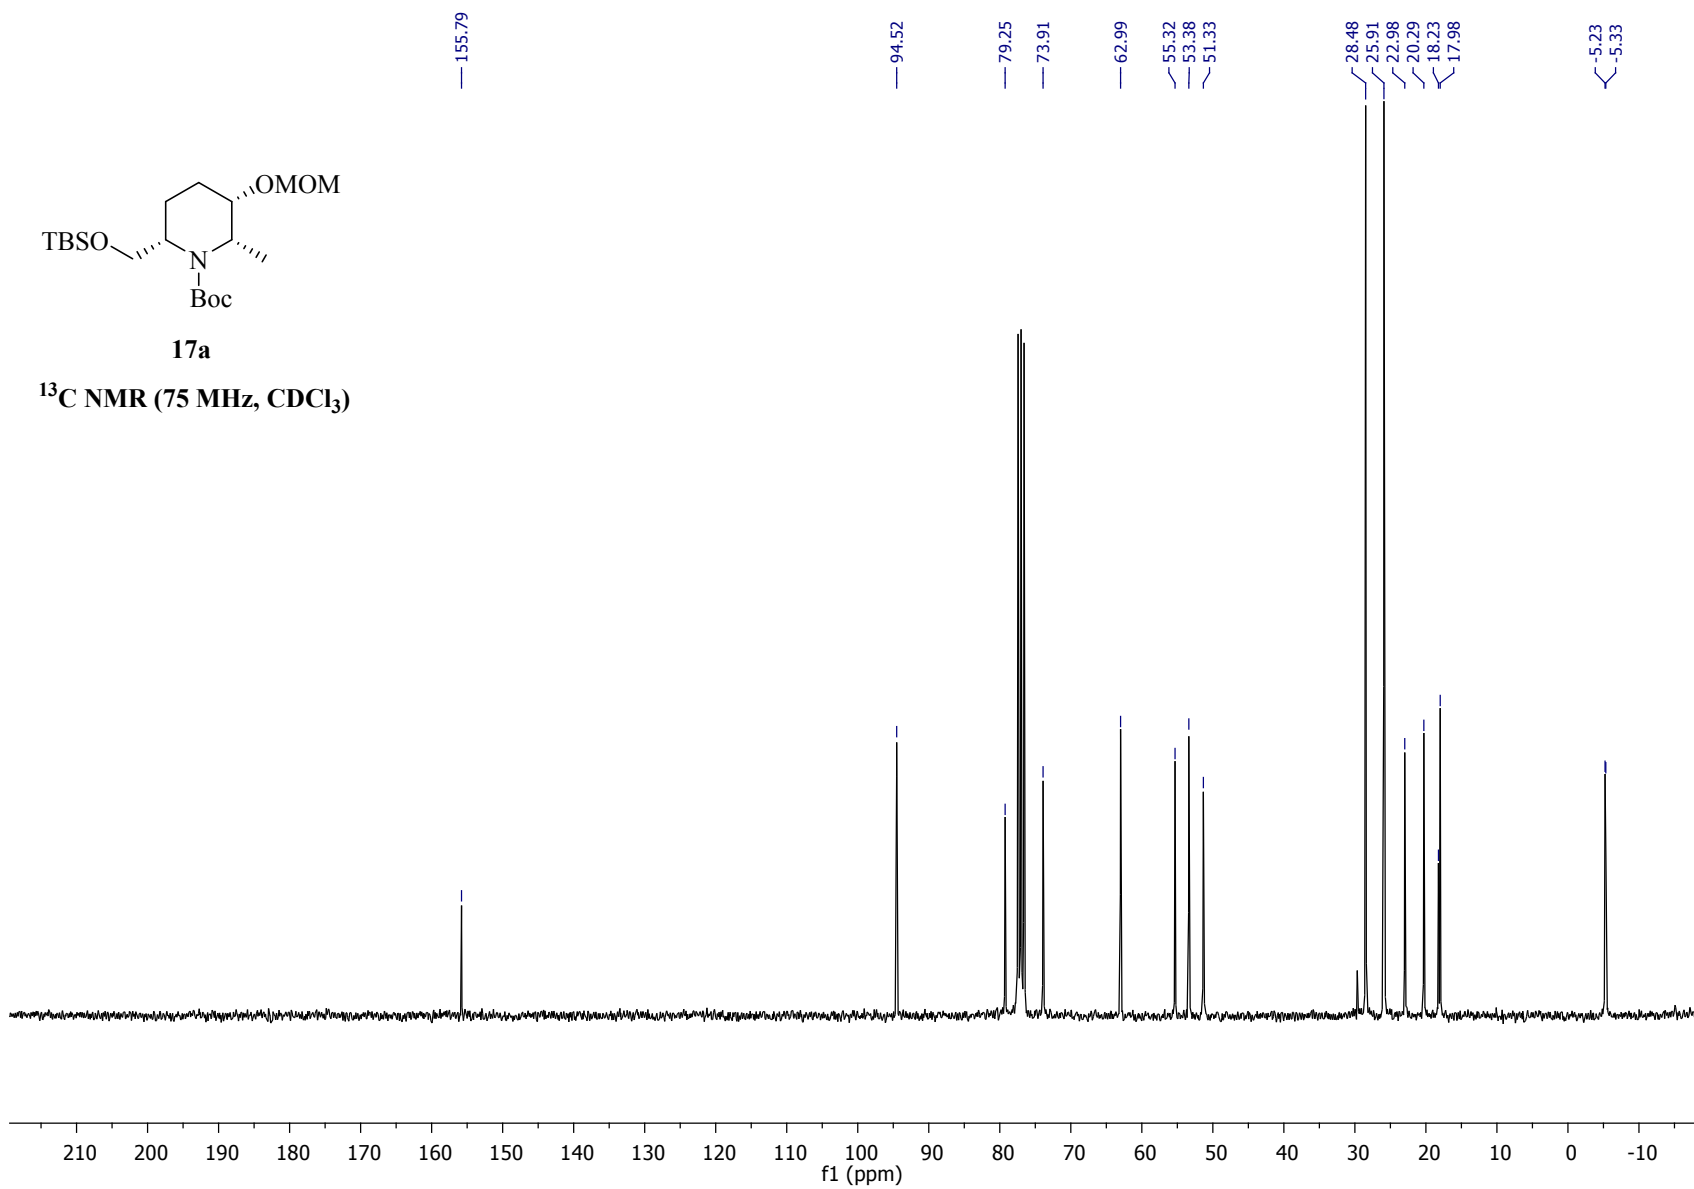



2D NOESY (Nuclear Overhauser effect spectroscopy) spectrum of compound **17a** in DMSO-d6 recorded on 600 MHz spectrometer.

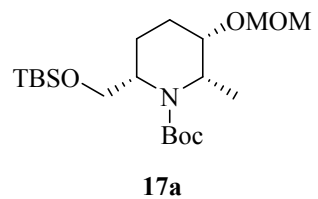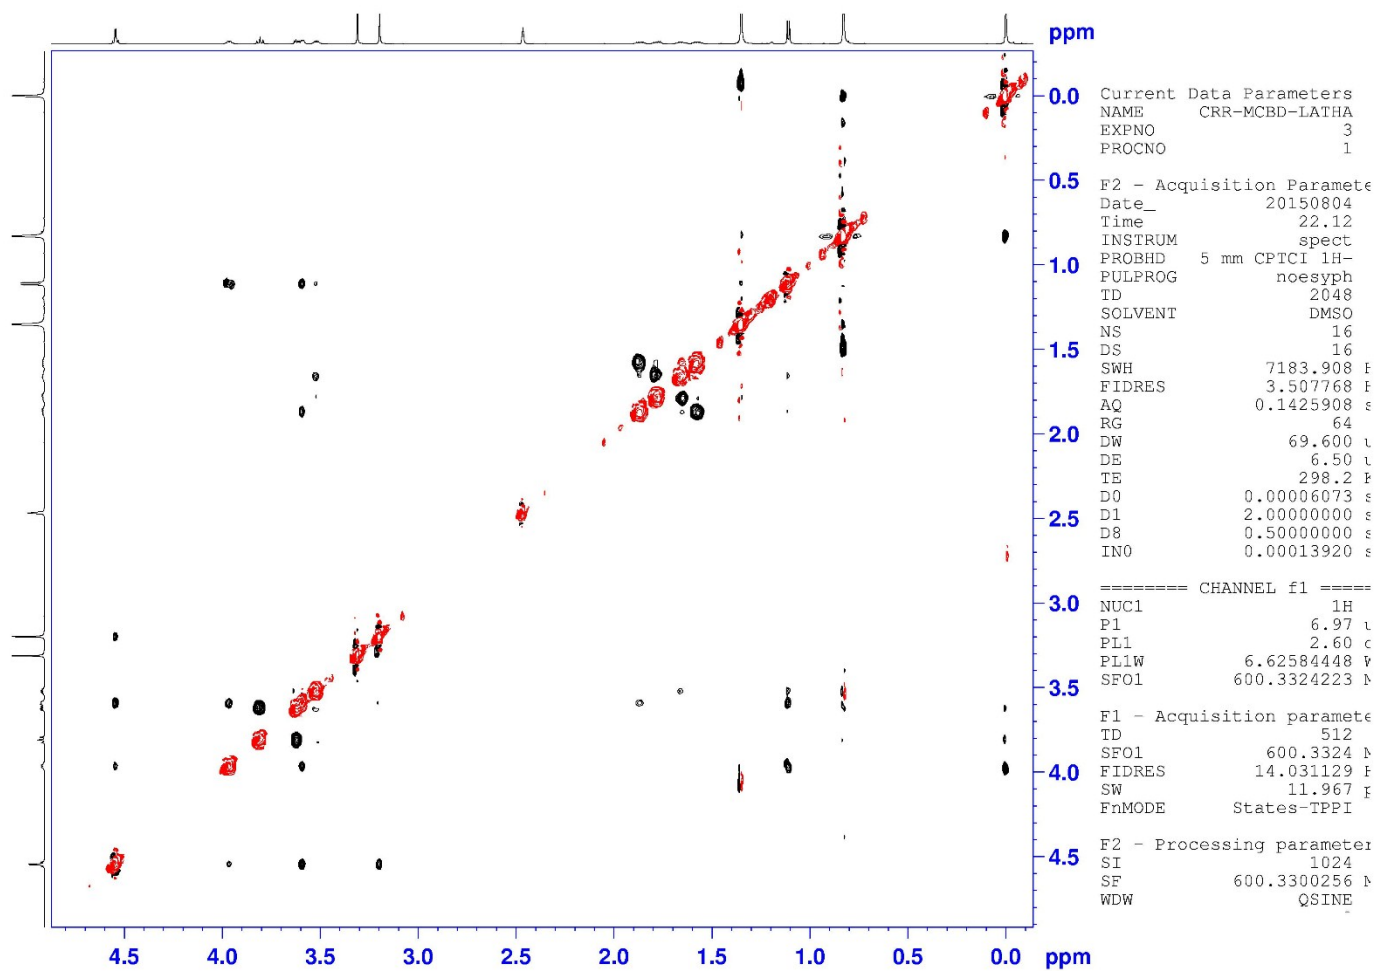

Expansions of 2D NOESY spectrum of compound **17** in DMSO-d<sub>6</sub> recorded on 600 MHz.

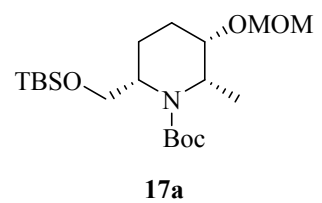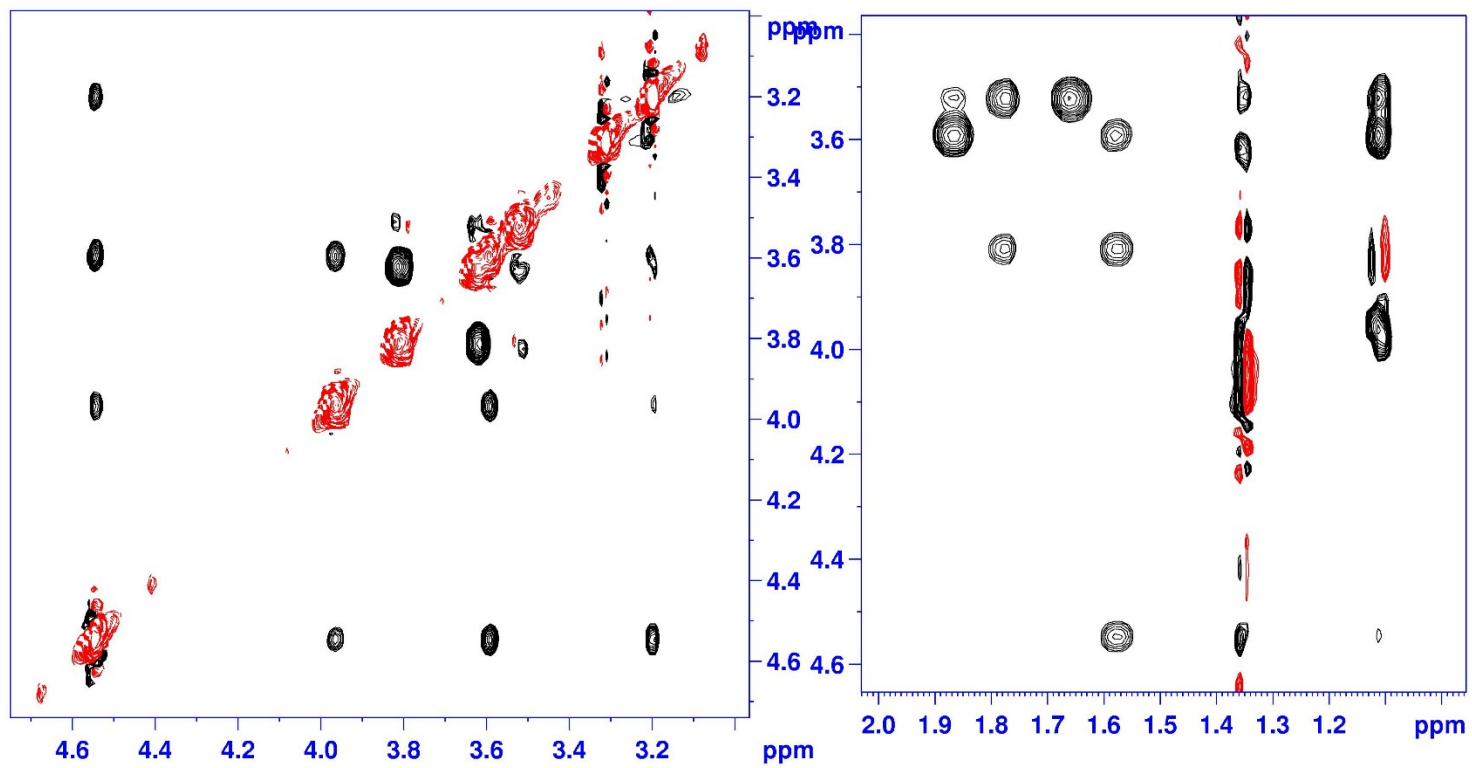

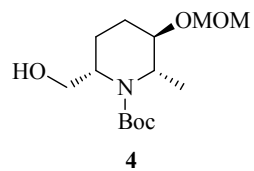

<sup>1</sup>H NMR (300 MHz, CDCl<sub>3</sub>)

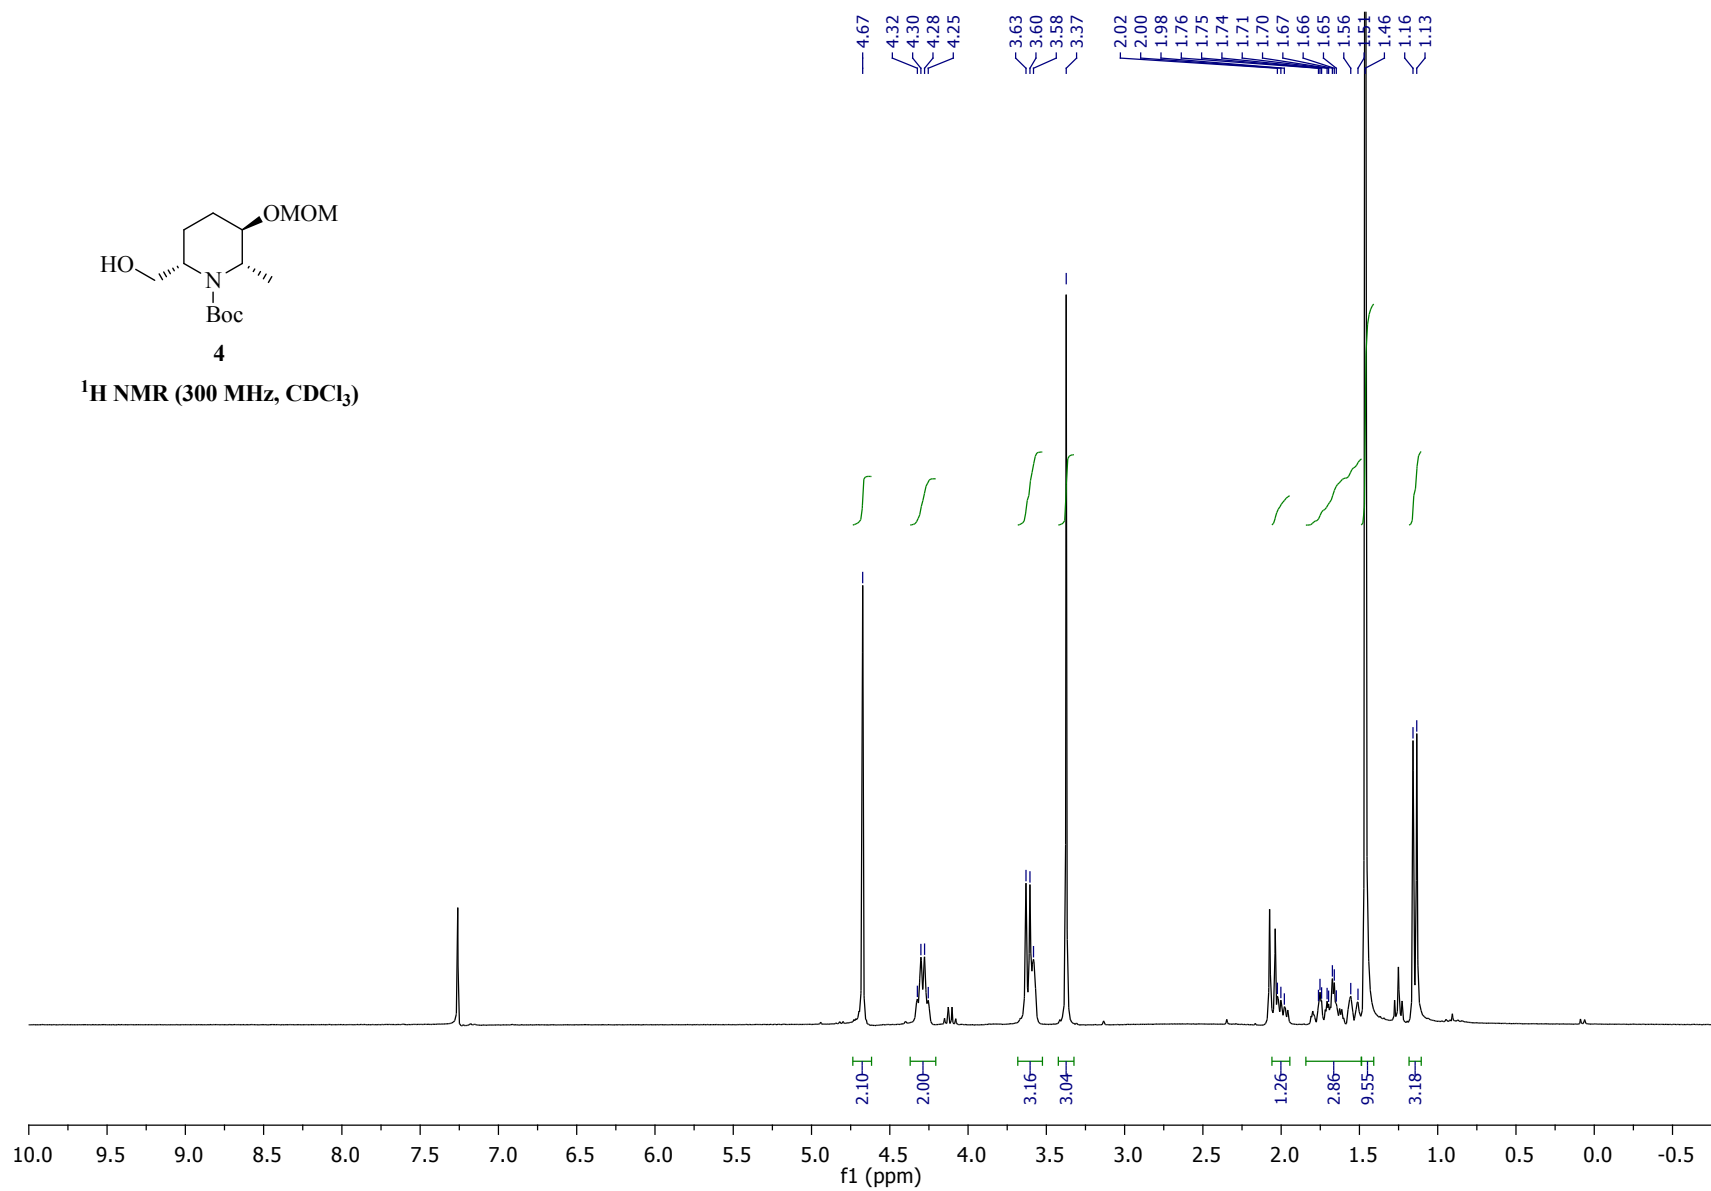

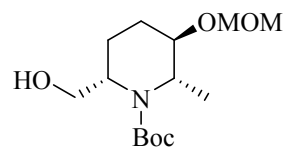

4

$^{13}\text{C}$  NMR (75 MHz,  $\text{CDCl}_3$ )

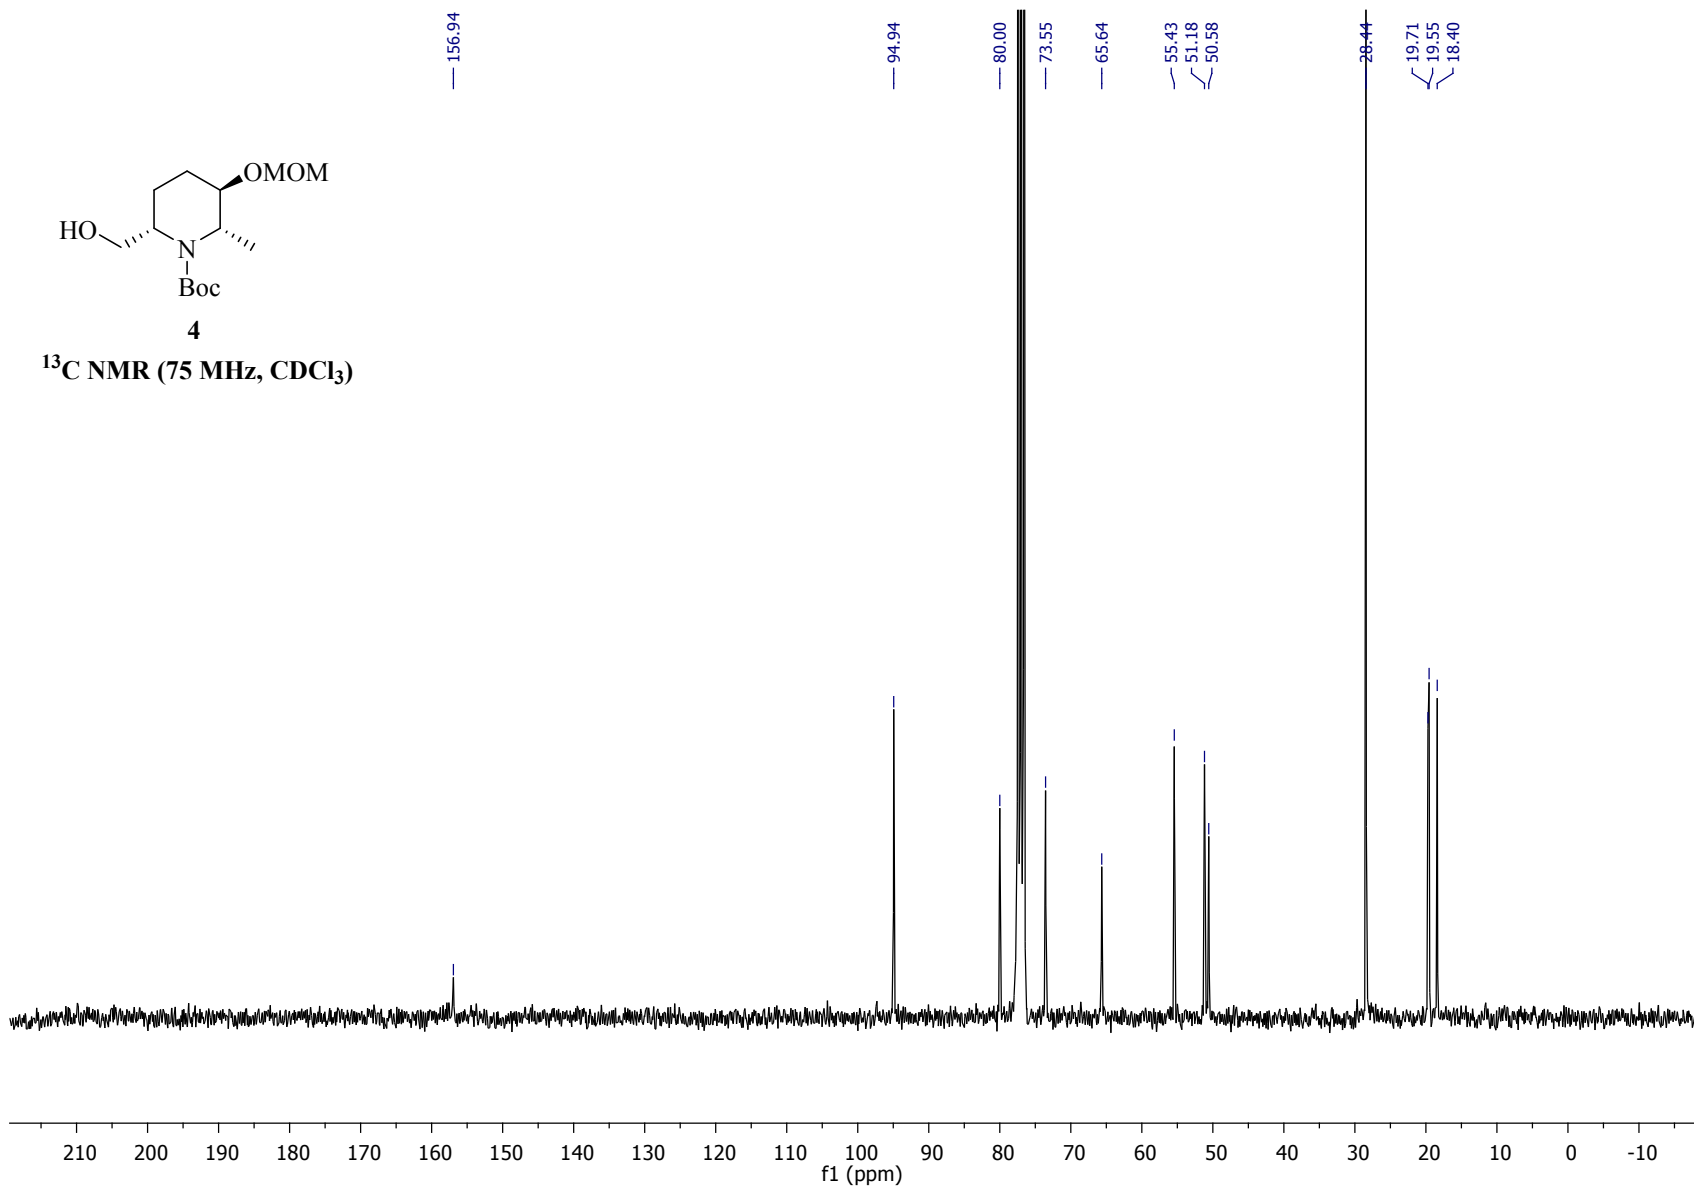

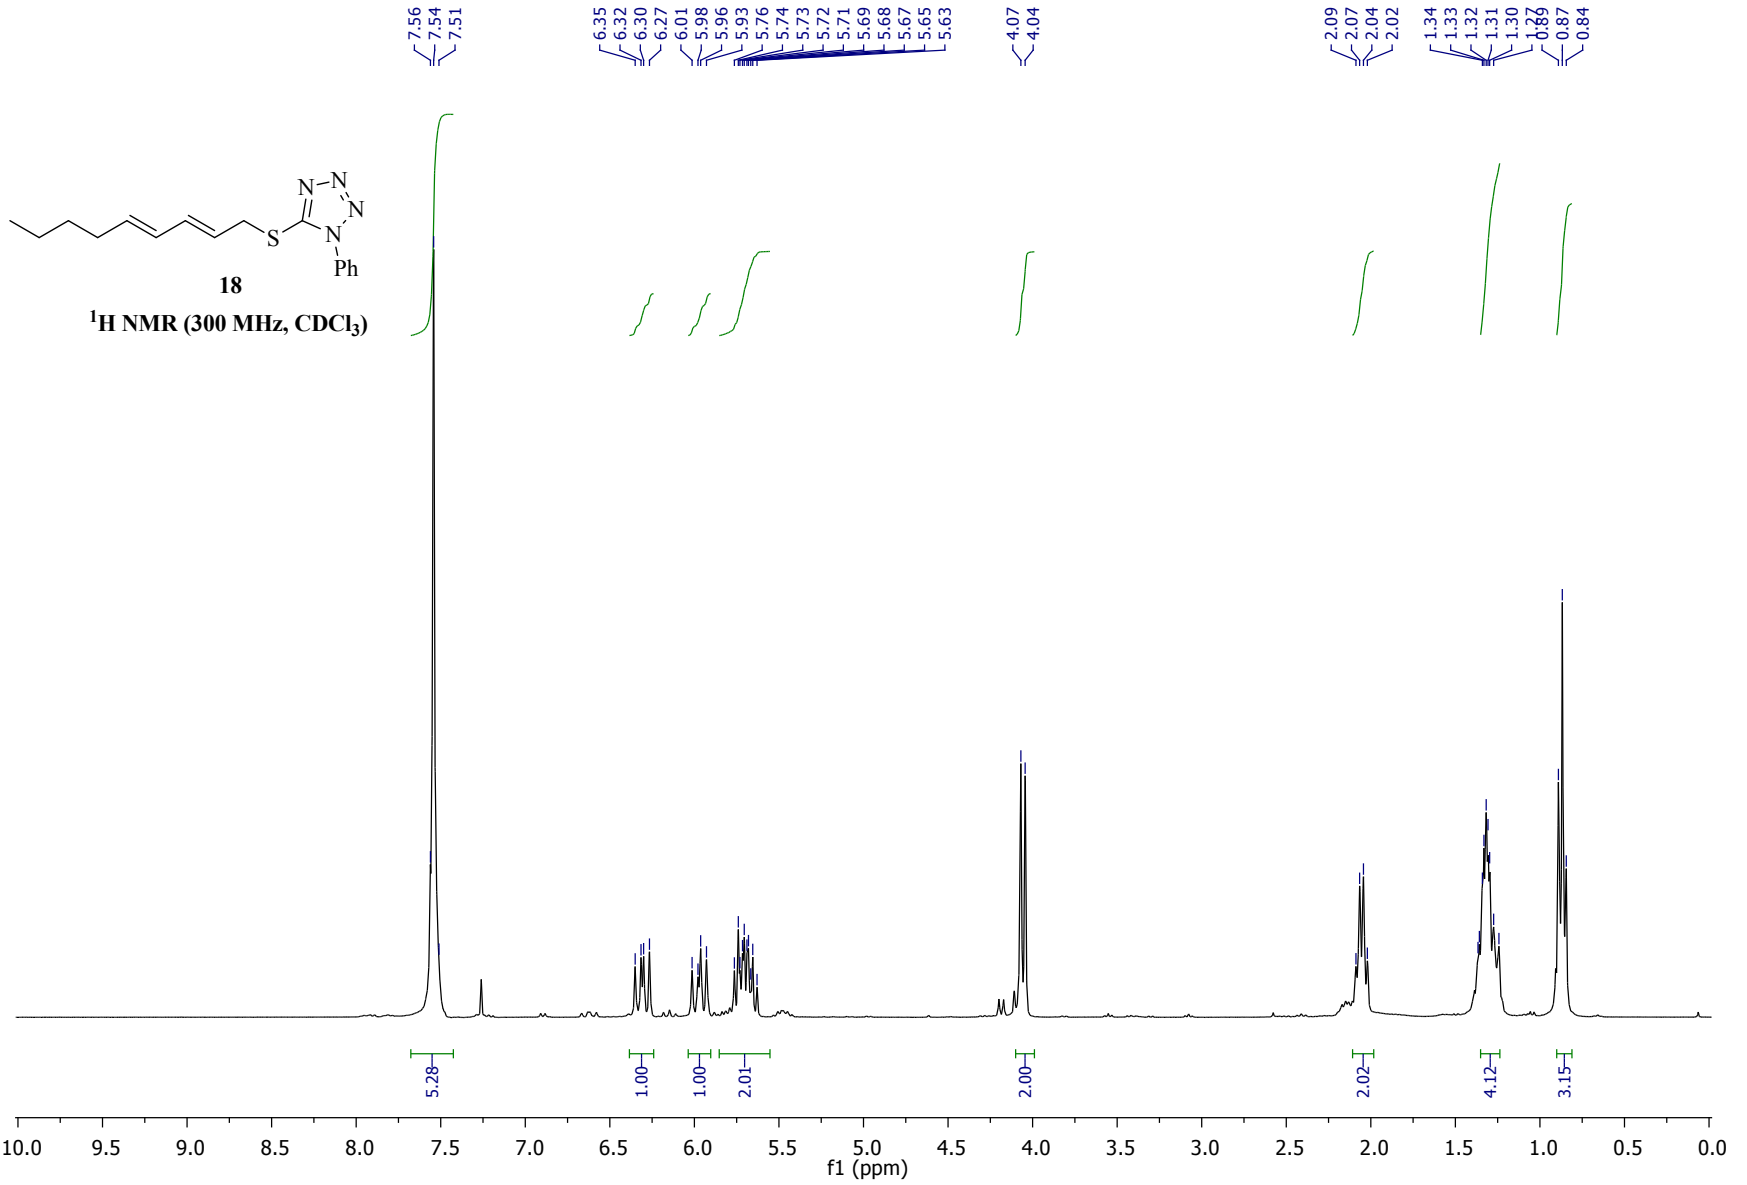

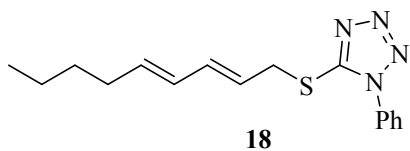

<sup>13</sup>C NMR (75 MHz, CDCl<sub>3</sub>)

153.83

137.00

135.87

133.63

130.02

129.68

128.74

123.78

122.89

35.75

32.24

31.14

22.14

13.84

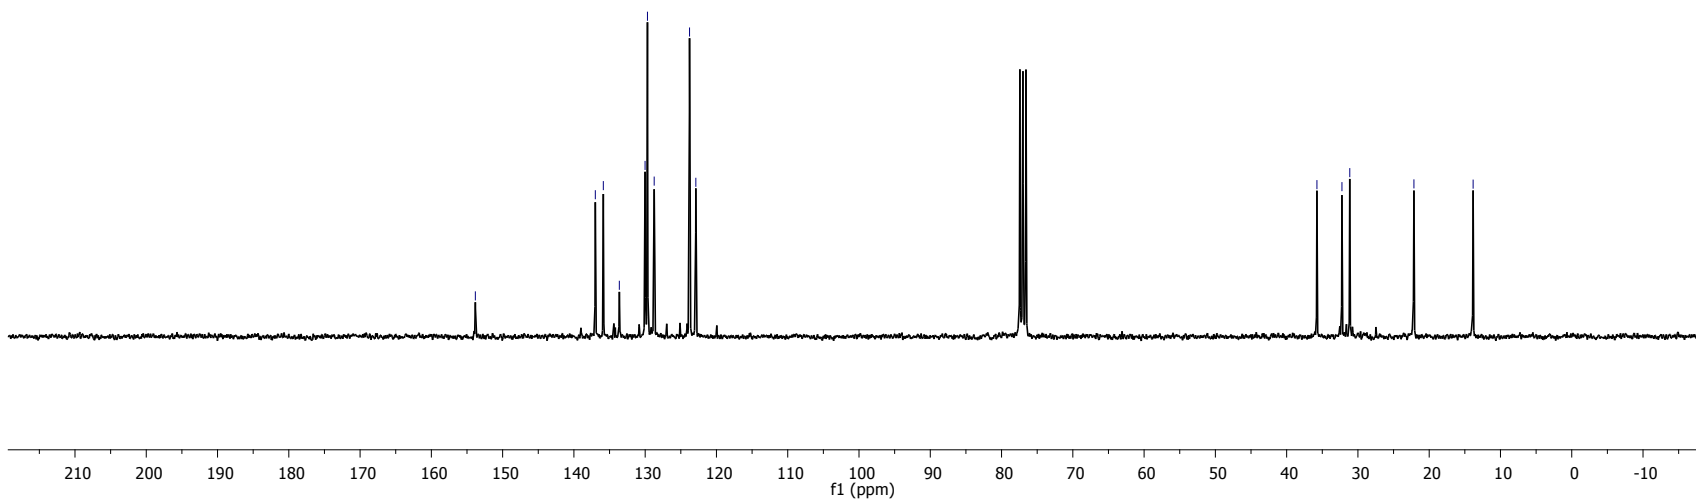

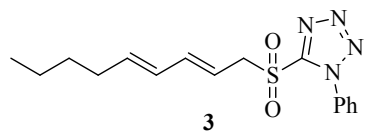

<sup>1</sup>H NMR (500 MHz, CDCl<sub>3</sub>)

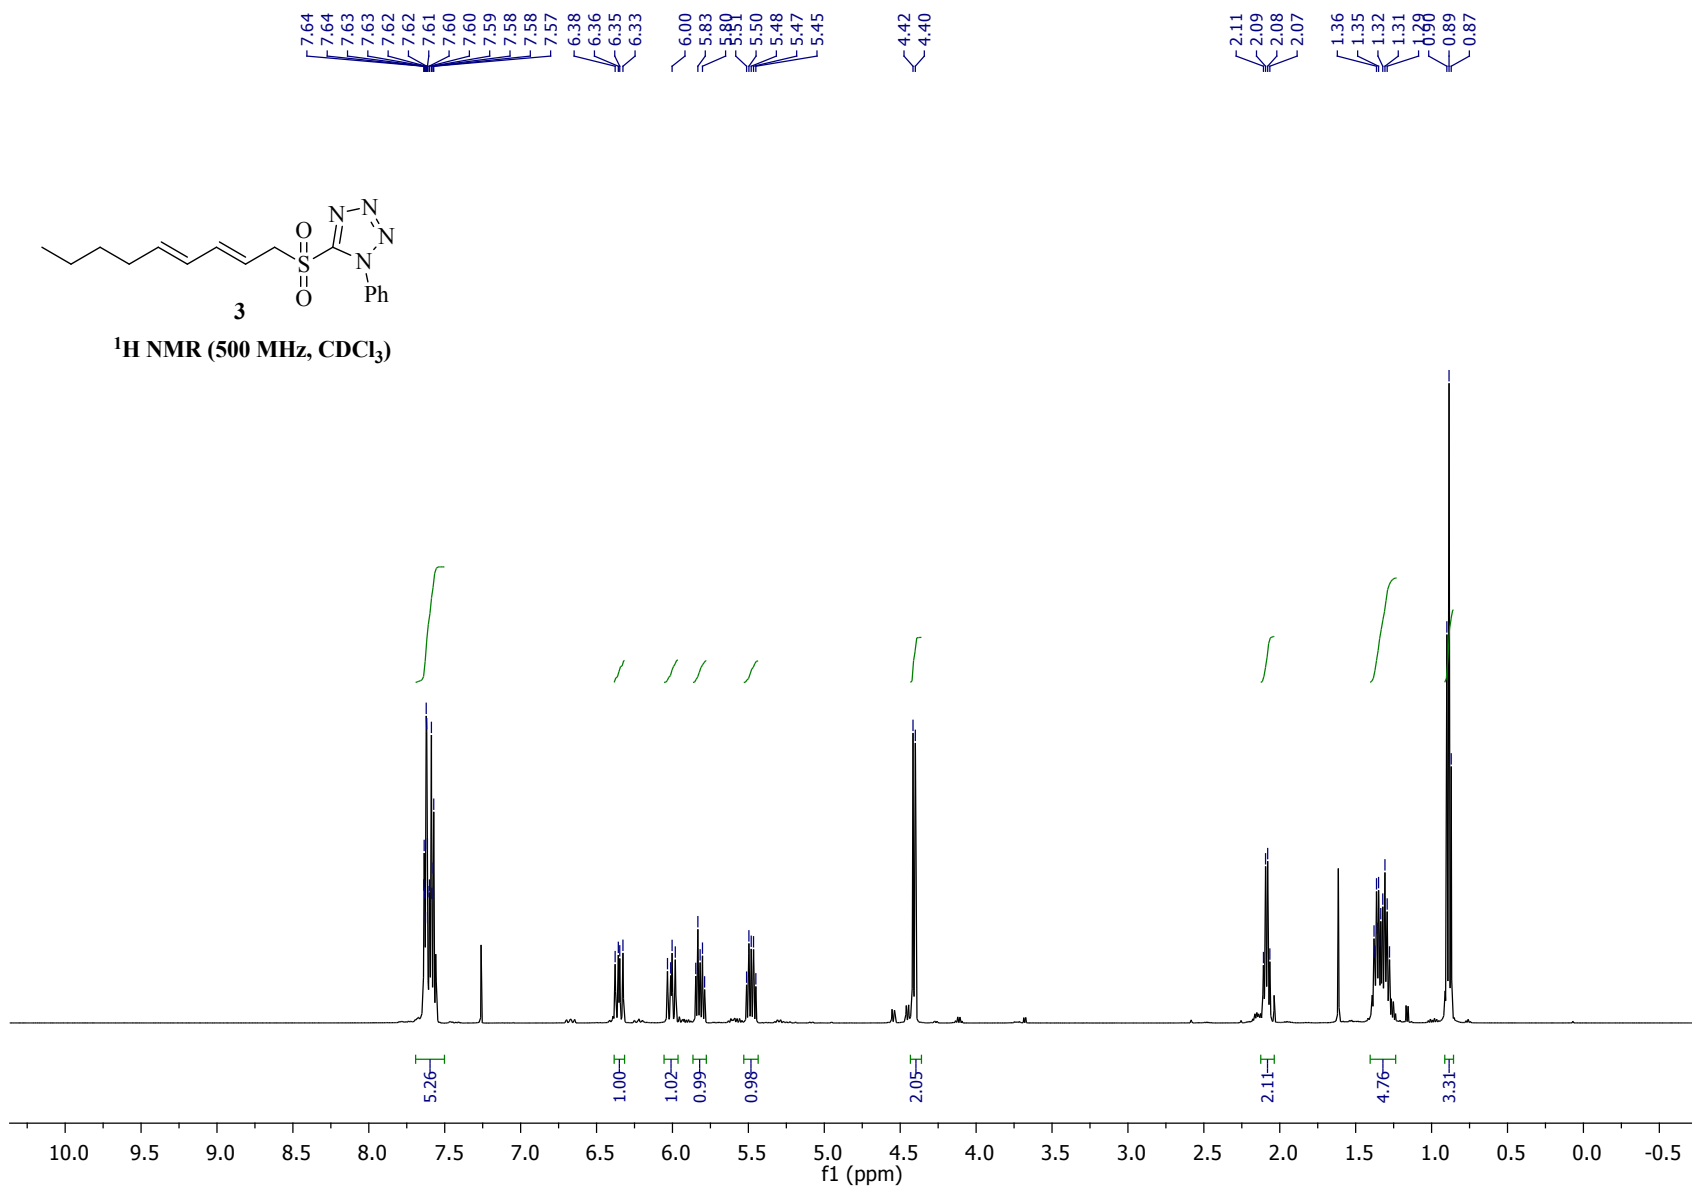

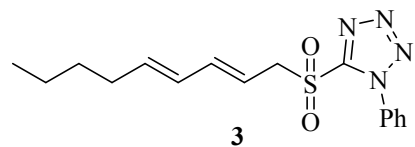

<sup>13</sup>C NMR (125 MHz, CDCl<sub>3</sub>)

- 153.09
- 142.46
- 139.92
- 132.95
- 131.38
- 129.54
- 128.52
- 125.22
- 111.87
- 60.05
- 32.28
- 30.93
- 22.17
- 13.83

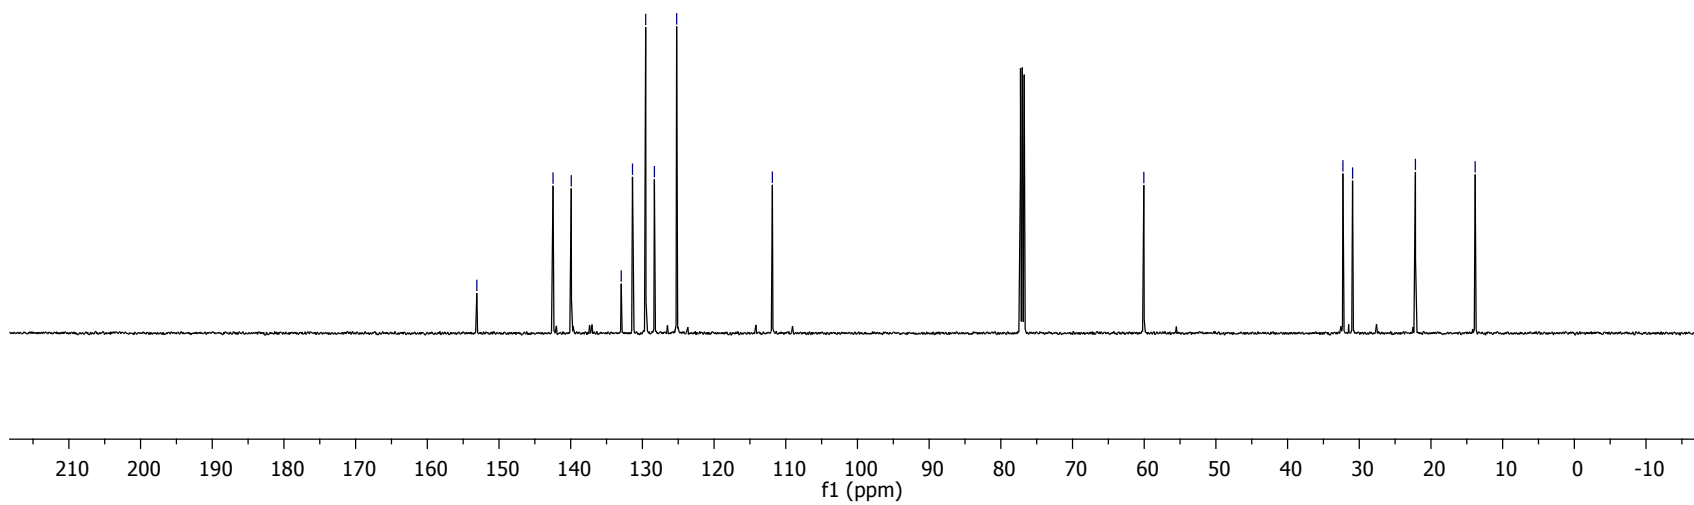



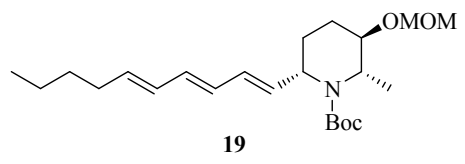

<sup>1</sup>H NMR (300 MHz, CDCl<sub>3</sub>)

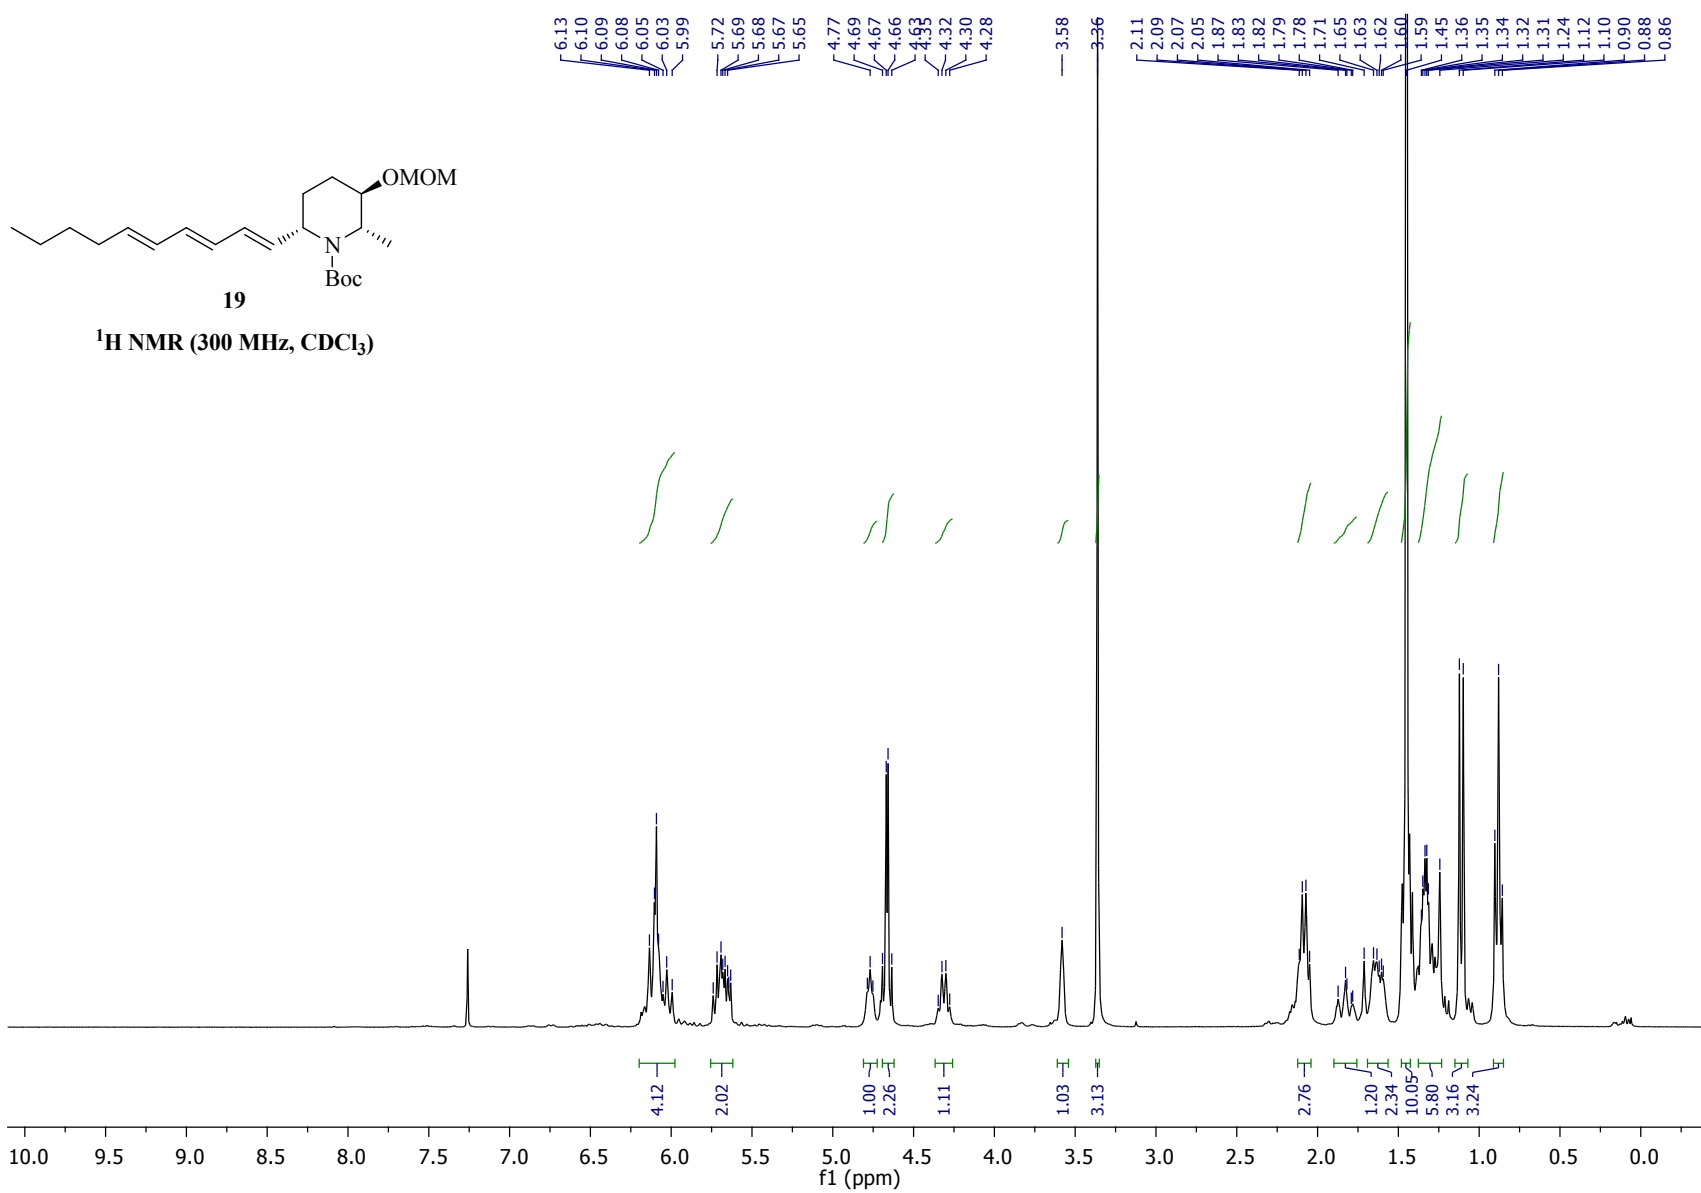

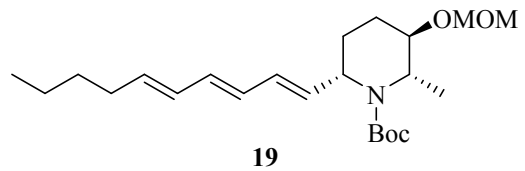

$^{13}\text{C}$  NMR (75 MHz,  $\text{CDCl}_3$ )

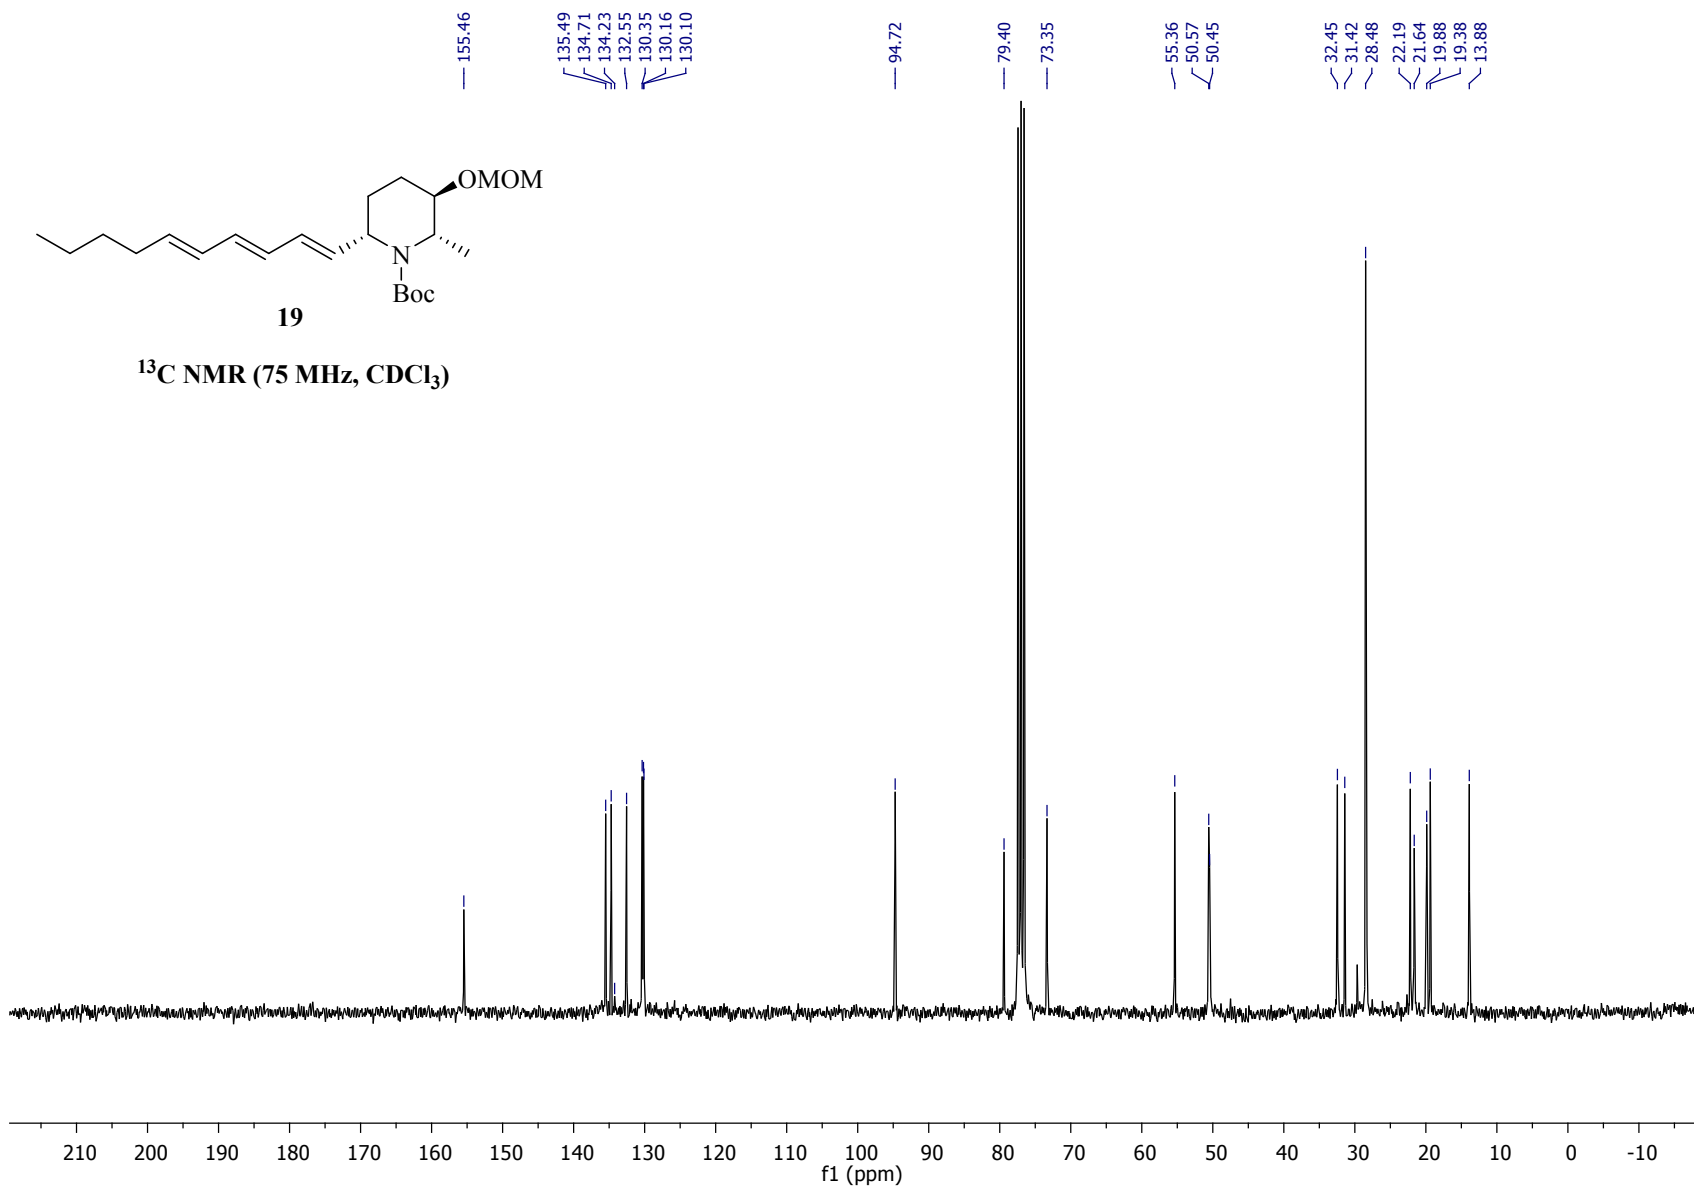

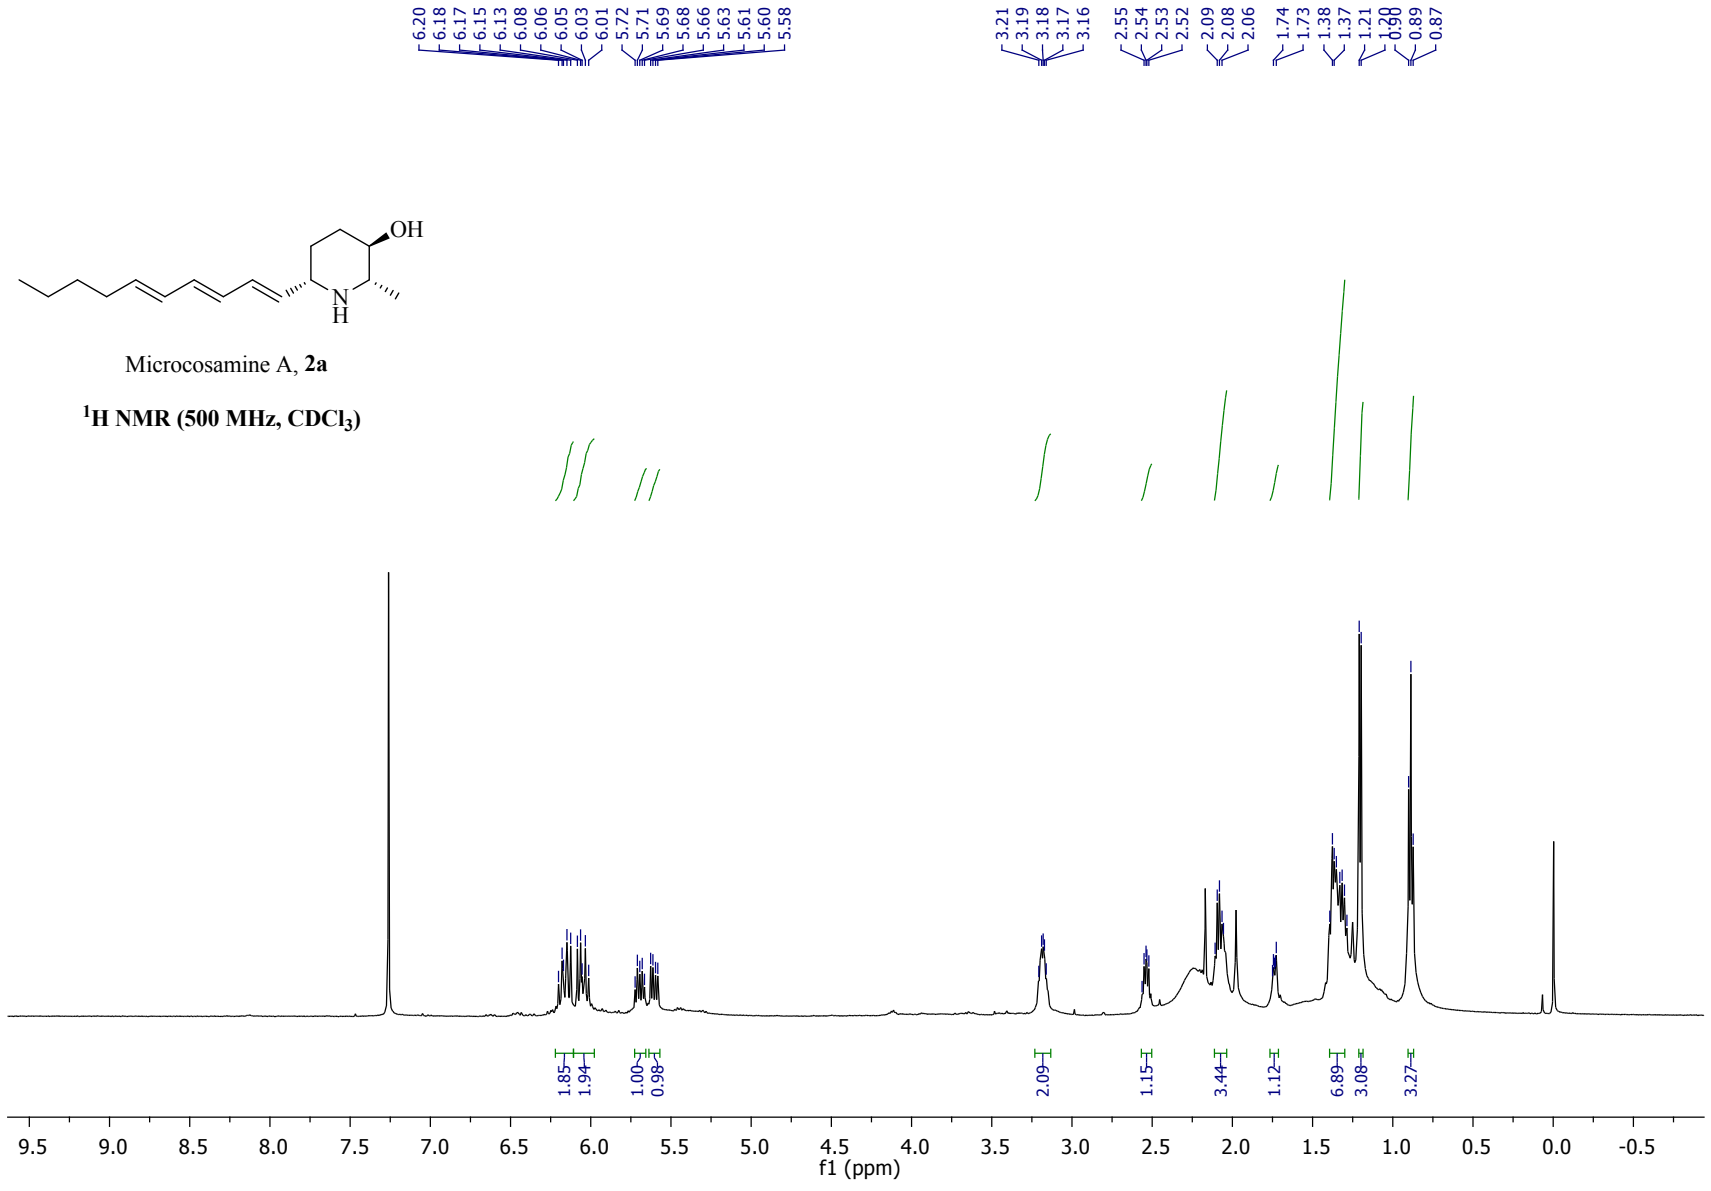

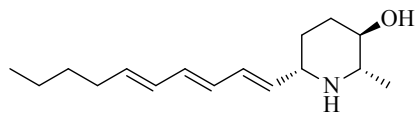

Microcosamine A, **2a**

$^{13}\text{C}$  NMR (125 MHz,  $\text{CDCl}_3$ )

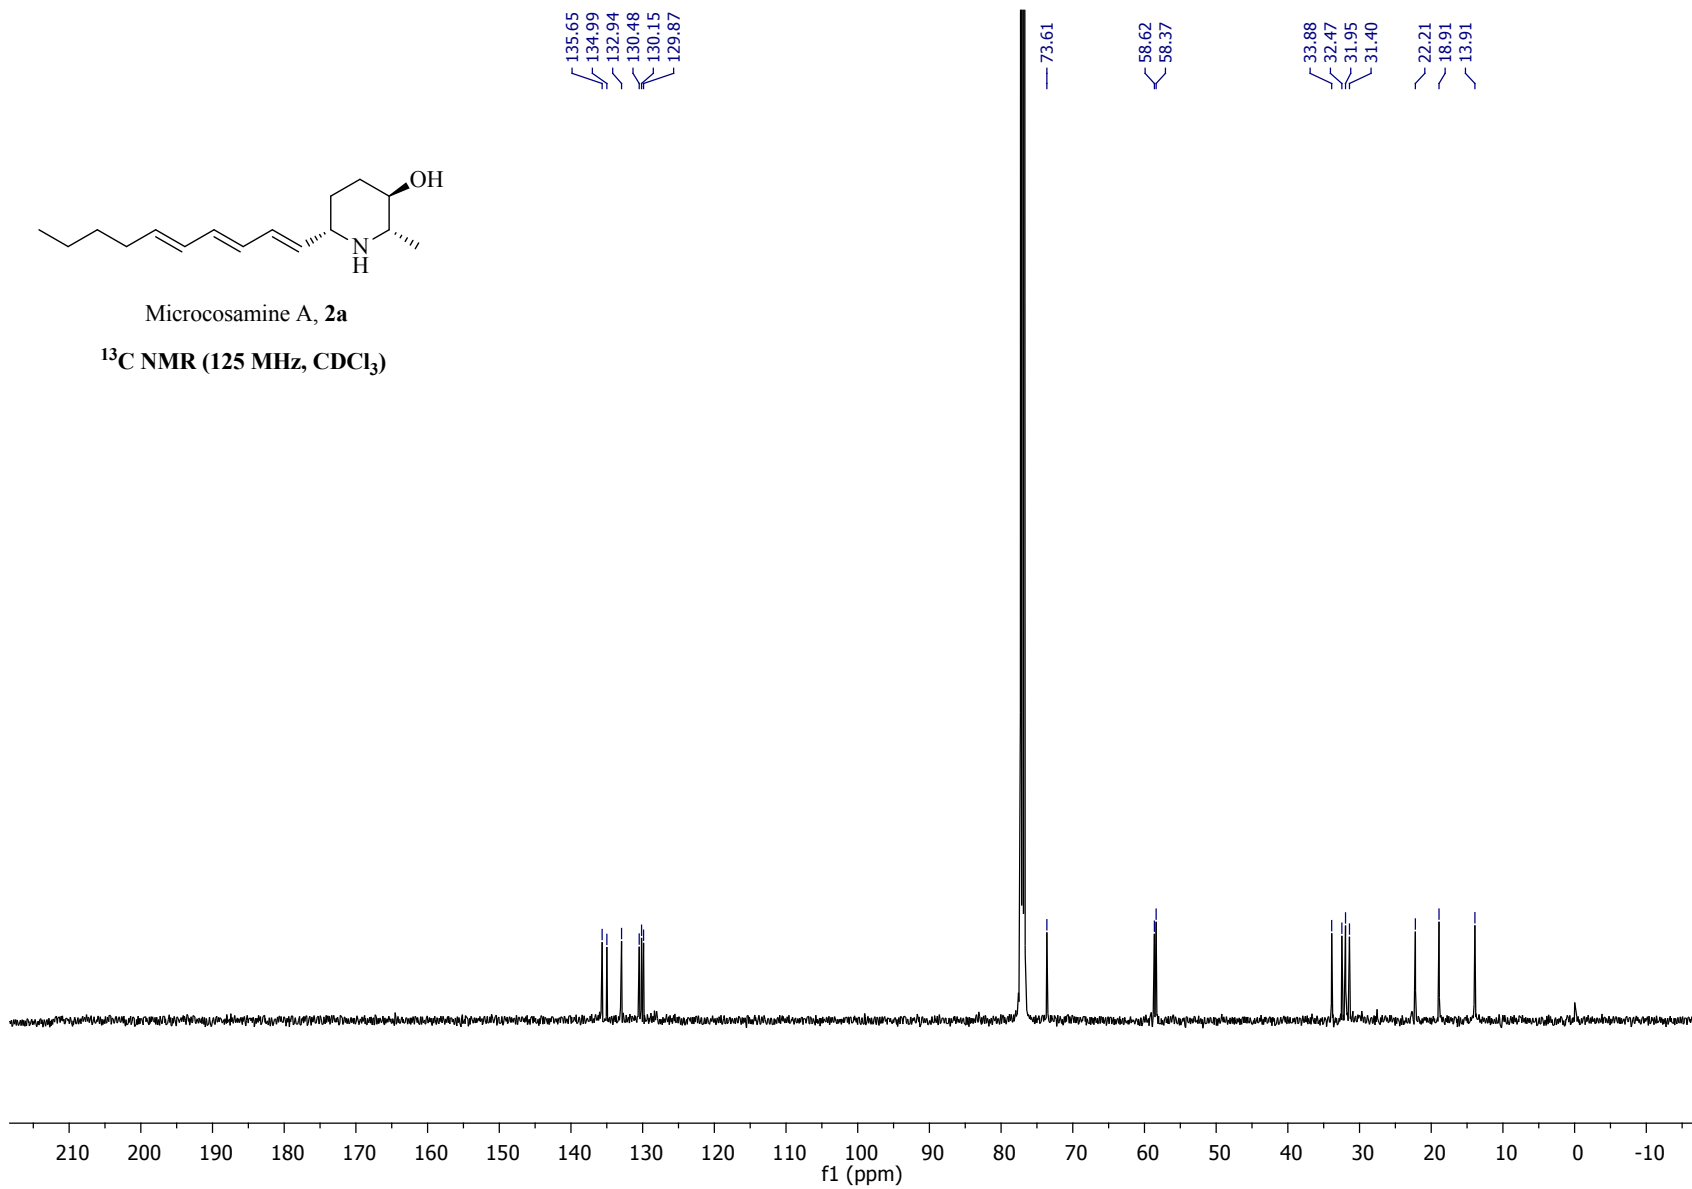

Supplement: c5ob02085a1.pdf [file c5ob02085a1.pdf]
